# Supplementary material
Source: publisher figshare collection journal article supplement (https://gsajournals.figshare.com/articles/dataset/_/6837674)
Supplement: Supplementary file 1 [file 1]

## Sheet: FT_expression_10C_stat_153.csv
Table S3. A list of genes correlated with flowering time (16ºC)
Gene ID	R	r2	p-value (LM)	Description
AT2G45660	-0.596929	0.348132	6.10629e-16	SOC1
AT5G10140	0.468368	0.267187	4.7611e-12	FLC
AT5G55120	-0.462945	0.20768	1.94218e-09	VTC5
AT4G03060	0.460177	0.198603	4.68462e-09	AOP2
AT3G57920	-0.402037	0.186234	1.53312e-08	SPL15
AT1G66140	-0.43755	0.17493	4.46926e-08	ZFP4
AT5G15840	-0.438719	0.172866	5.42582e-08	CO
AT2G35310	-0.402442	0.167038	9.36284e-08	Transcriptional factor
AT5G11270	-0.405594	0.164168	1.22337e-07	OCP3
AT4G03050	-0.167429	0.157978	2.17257e-07	AOP3
AT5G17700	0.411339	0.155341	2.77166e-07	MATE
AT2G01830	-0.409931	0.153028	3.4301e-07	AHK4
AT1G55170	-0.394722	0.144826	7.27655e-07	protein_coding
AT4G29740	0.408156	0.144369	7.58652e-07	ATCKX4
AT1G67900	0.398585	0.141992	9.42355e-07	Phototropic-responsive
AT1G78820	0.428824	0.136619	1.53558e-06	D-mannose
AT3G02220	-0.409019	0.136201	1.595e-06	protein_coding
AT3G19710	0.404242	0.135484	1.70197e-06	BCAT4
AT3G11000	-0.408369	0.135292	1.73191e-06	DCD
AT4G24540	-0.377809	0.131752	2.38507e-06	AGL24
AT2G31390	0.348721	0.12883	3.10416e-06	pfkB-like
AT4G39070	-0.35719	0.128742	3.12881e-06	B-box
AT4G24350	0.403516	0.125489	4.19227e-06	Phosphorylase
AT4G13430	0.388461	0.125417	4.21933e-06	ATLEUC1
AT1G11580	0.433951	0.123748	4.90109e-06	ATPMEPCRA
AT5G13790	-0.374963	0.123533	4.99656e-06	AGL15
AT3G22750	-0.354192	0.123414	5.04997e-06	Protein kinase superfamily protein
AT2G47670	0.345951	0.122318	5.57113e-06	PMEI6
AT1G31660	-0.348784	0.121698	5.88923e-06	protein_coding
AT5G11230	-0.38234	0.120244	6.70756e-06	Nucleotide-sugar
AT2G06050	0.374583	0.120061	6.81813e-06	AtOPR3
AT2G22240	0.397236	0.119338	7.27334e-06	ATIPS2
AT2G42870	-0.362053	0.118444	7.87756e-06	HLH1
AT3G13898	-0.36611	0.116967	8.98808e-06	protein_coding
AT1G58370	0.377485	0.116625	9.26575e-06	ATXYN1
AT3G08770	-0.371853	0.116623	9.26812e-06	LTP6
AT1G44810	-0.378052	0.116482	9.38496e-06	DNA-binding
AT4G13770	0.365135	0.115744	1.00235e-05	CYP83A1
AT3G02020	0.399502	0.114718	1.09822e-05	AK3
AT5G10390	-0.348473	0.114508	1.1189e-05	Histone
AT5G25757	-0.35107	0.113882	1.18306e-05	RNA polymerase I-associated factor
AT2G46640	0.348873	0.113736	1.19852e-05	protein_coding
AT5G57340	-0.349949	0.11314	1.26374e-05	protein_coding
AT1G09850	0.340081	0.112645	1.32063e-05	XBCP3
AT2G39681	-0.33925	0.112588	1.32735e-05	TAS2
AT5G51460	-0.348065	0.112045	1.393e-05	ATTPPA
AT5G08180	-0.332847	0.111998	1.39883e-05	Ribosomal
AT3G63290	-0.343008	0.11131	1.48691e-05	2-oxoglutarate
AT2G39130	0.389752	0.109425	1.75775e-05	Transmembrane
AT1G15870	-0.303086	0.106863	2.20577e-05	Mitochondrial
AT1G16410	0.365152	0.106725	2.23287e-05	BUS1
AT2G04080	0.336753	0.106473	2.28313e-05	MATE
AT5G66658	-0.339927	0.106424	2.29308e-05	protein_coding

## Sheet: FT_expression_10C_stat_153. (2)
Res_s	Res_r_s_label	Res_p_s_label
AT2G45660	-0.596929	0.348132	6.10629e-16
AT5G10140	0.468368	0.267187	4.7611e-12
AT5G55120	-0.462945	0.20768	1.94218e-09
AT4G03060	0.460177	0.198603	4.68462e-09
AT3G57920	-0.402037	0.186234	1.53312e-08
AT1G66140	-0.43755	0.17493	4.46926e-08
AT5G15840	-0.438719	0.172866	5.42582e-08
AT2G35310	-0.402442	0.167038	9.36284e-08
AT5G11270	-0.405594	0.164168	1.22337e-07
AT4G03050	-0.167429	0.157978	2.17257e-07
AT5G17700	0.411339	0.155341	2.77166e-07
AT2G01830	-0.409931	0.153028	3.4301e-07
AT1G55170	-0.394722	0.144826	7.27655e-07
AT4G29740	0.408156	0.144369	7.58652e-07
AT1G67900	0.398585	0.141992	9.42355e-07
AT1G78820	0.428824	0.136619	1.53558e-06
AT3G02220	-0.409019	0.136201	1.595e-06
AT3G19710	0.404242	0.135484	1.70197e-06
AT3G11000	-0.408369	0.135292	1.73191e-06
AT4G24540	-0.377809	0.131752	2.38507e-06
AT2G31390	0.348721	0.12883	3.10416e-06
AT4G39070	-0.35719	0.128742	3.12881e-06
AT4G24350	0.403516	0.125489	4.19227e-06
AT4G13430	0.388461	0.125417	4.21933e-06
AT1G11580	0.433951	0.123748	4.90109e-06
AT5G13790	-0.374963	0.123533	4.99656e-06
AT3G22750	-0.354192	0.123414	5.04997e-06
AT2G47670	0.345951	0.122318	5.57113e-06
AT1G31660	-0.348784	0.121698	5.88923e-06
AT5G11230	-0.38234	0.120244	6.70756e-06
AT2G06050	0.374583	0.120061	6.81813e-06
AT2G22240	0.397236	0.119338	7.27334e-06
AT2G42870	-0.362053	0.118444	7.87756e-06
AT3G13898	-0.36611	0.116967	8.98808e-06
AT1G58370	0.377485	0.116625	9.26575e-06
AT3G08770	-0.371853	0.116623	9.26812e-06
AT1G44810	-0.378052	0.116482	9.38496e-06
AT4G13770	0.365135	0.115744	1.00235e-05
AT3G02020	0.399502	0.114718	1.09822e-05
AT5G10390	-0.348473	0.114508	1.1189e-05
AT5G25757	-0.35107	0.113882	1.18306e-05
AT2G46640	0.348873	0.113736	1.19852e-05
AT5G57340	-0.349949	0.11314	1.26374e-05
AT1G09850	0.340081	0.112645	1.32063e-05
AT2G39681	-0.33925	0.112588	1.32735e-05
AT5G51460	-0.348065	0.112045	1.393e-05
AT5G08180	-0.332847	0.111998	1.39883e-05
AT3G63290	-0.343008	0.11131	1.48691e-05
AT2G39130	0.389752	0.109425	1.75775e-05
AT1G15870	-0.303086	0.106863	2.20577e-05
AT1G16410	0.365152	0.106725	2.23287e-05
AT2G04080	0.336753	0.106473	2.28313e-05
AT5G66658	-0.339927	0.106424	2.29308e-05
AT5G36240	-0.309545	0.105861	2.41012e-05
AT5G33290	0.380907	0.105514	2.4854e-05
AT5G49630	0.347079	0.105513	2.4856e-05
AT1G63010	0.348621	0.105089	2.58053e-05
AT3G03420	-0.374785	0.104749	2.6593e-05
AT2G27360	0.329782	0.1045	2.71848e-05
AT3G11280	-0.337804	0.104431	2.73509e-05
AT2G23010	0.364017	0.104429	2.73554e-05
AT1G11670	0.350003	0.104269	2.77439e-05
AT3G18830	0.368368	0.104048	2.82926e-05
AT3G63300	-0.379671	0.104008	2.83917e-05
AT5G15970	-0.334064	0.103682	2.92229e-05
AT4G21870	-0.314782	0.103362	3.00603e-05
AT5G11580	-0.337291	0.1026	3.21515e-05
AT5G53280	-0.375783	0.102543	3.23132e-05
AT5G38120	0.371885	0.102415	3.26798e-05
AT5G04620	-0.353814	0.101251	3.62151e-05
AT1G08610	-0.381171	0.100329	3.92821e-05
AT3G61898	-0.323962	0.100127	3.99866e-05
AT1G20440	-0.331004	0.100024	4.03522e-05
AT3G49080	-0.340827	0.0994158	4.25724e-05
AT1G67865	-0.317667	0.098517	4.60788e-05
AT3G62390	-0.338621	0.0983007	4.69644e-05
AT2G14890	-0.345695	0.0982216	4.72925e-05
AT5G14200	0.342789	0.0981156	4.77358e-05
AT1G76560	-0.386147	0.0980877	4.78531e-05
AT5G51120	-0.348347	0.0980706	4.79252e-05
AT2G44670	-0.361591	0.0979178	4.85743e-05
AT3G19515	-0.276763	0.0975742	5.00651e-05
AT5G06770	-0.336019	0.0972271	5.16171e-05
AT4G24660	-0.326954	0.0971441	5.19955e-05
AT3G13175	-0.329083	0.0966748	5.41861e-05
AT2G43120	-0.295916	0.096311	5.59473e-05
N_new_gene_409	-0.318036	0.0961322	5.68337e-05
AT2G34810	0.338506	0.0960224	5.73849e-05
AT1G31690	0.348833	0.0959912	5.75427e-05
AT3G52840	-0.284789	0.0959088	5.79606e-05
AT2G31790	0.332629	0.0958102	5.84651e-05
AT2G39560	-0.310748	0.0957586	5.8731e-05
AT1G44350	0.354651	0.0956055	5.95263e-05
AT1G53040	-0.322427	0.0954354	6.04226e-05
AT3G57020	0.324082	0.0954351	6.04246e-05
AT4G19460	0.297644	0.095167	6.18647e-05
AT5G12100	-0.308048	0.0950189	6.26747e-05
AT5G44080	-0.339155	0.0946698	6.46264e-05
AT1G33230	-0.329977	0.0944728	6.57538e-05
AT5G24750	-0.327684	0.0943852	6.62618e-05
AT5G06530	-0.344263	0.094309	6.67065e-05
AT3G17240	0.340812	0.0942031	6.73294e-05
AT1G75230	0.298428	0.0937495	7.00651e-05
AT1G54000	0.350927	0.0936933	7.04116e-05
AT3G02555	-0.298362	0.093199	7.3533e-05
AT1G31040	-0.313006	0.0931905	7.35877e-05
AT1G77210	0.351009	0.0929497	7.51591e-05
N_new_gene_458	-0.310178	0.0928754	7.56504e-05
AT5G03500	-0.356906	0.0924352	7.86287e-05
AT5G15530	-0.322915	0.0924134	7.87796e-05
AT3G22890	0.339549	0.0923941	7.89129e-05
AT3G12500	0.389747	0.0921897	8.03405e-05
AT3G49110	0.33586	0.0921868	8.03607e-05
AT2G04032	0.270318	0.0921827	8.03898e-05
AT2G42540	-0.311354	0.0914788	8.55074e-05
AT1G78490	0.351198	0.0914352	8.58343e-05
AT5G66920	-0.332156	0.0912696	8.70894e-05
AT1G64710	0.308676	0.091261	8.71556e-05
N_new_gene_201	-0.26359	0.091148	8.80229e-05
AT1G07300	-0.305394	0.0910046	8.91356e-05
AT1G33590	0.316432	0.0909947	8.92133e-05
AT2G28040	-0.329608	0.0909618	8.9471e-05
AT5G07460	0.333174	0.0908404	9.04281e-05
AT1G26240	0.359366	0.0907914	9.08172e-05
AT1G65710	-0.305884	0.0907685	9.09993e-05
AT1G52770	-0.309156	0.0907234	9.13596e-05
AT1G26250	0.35315	0.0905611	9.26679e-05
AT2G03780	-0.324369	0.0902813	9.49681e-05
N_new_gene_293	-0.294743	0.0900205	9.71627e-05
AT1G08340	0.308608	0.0899997	9.73392e-05
AT2G17560	-0.314999	0.0899511	9.7755e-05
AT2G31010	-0.323794	0.0898638	9.85048e-05
AT5G63440	-0.349374	0.0896925	9.99938e-05
AT2G17420	0.288399	0.0896659	0.000100227
AT2G19870	-0.30209	0.0892791	0.00010368
AT2G38750	0.336414	0.0891708	0.000104668
AT4G14310	-0.285431	0.0891685	0.000104689
AT3G13065	-0.323028	0.0890501	0.00010578
AT5G14800	-0.333643	0.0890309	0.000105957
AT5G63120	-0.320899	0.0887579	0.00010852
AT2G47180	0.367199	0.0886457	0.000109591
AT3G49120	0.336133	0.0885748	0.000110274
AT2G19210	0.284475	0.0885482	0.00011053
AT1G73830	-0.274329	0.0884114	0.000111862
AT4G00238	-0.320204	0.0883663	0.000112304
AT1G14510	-0.326952	0.0881436	0.000114514
AT3G62460	0.335637	0.0881015	0.000114937
AT4G12420	-0.328913	0.0880562	0.000115393
AT4G05120	-0.288702	0.0879472	0.000116499
AT4G17100	0.329289	0.087901	0.000116971
AT3G12670	-0.326902	0.0878244	0.000117757
AT1G61730	-0.290792	0.0877927	0.000118085
AT5G45600	-0.312193	0.0877251	0.000118785
AT1G08560	-0.301913	0.0876682	0.000119377
AT3G42670	-0.302428	0.0873851	0.00012237
AT2G34670	-0.321055	0.0872407	0.000123926
AT4G30930	-0.313797	0.0872054	0.000124309
AT4G03100	-0.35906	0.0870711	0.000125778
AT5G03555	0.284353	0.0868953	0.000127726
AT4G11140	-0.287025	0.0868756	0.000127947
AT3G48480	-0.333148	0.0865504	0.000131637
AT3G55690	-0.340044	0.0864251	0.000133087
AT2G41650	-0.322131	0.0862434	0.000135218
AT5G10410	-0.309704	0.0860835	0.000137121
AT4G30890	-0.304952	0.0859646	0.000138553
AT3G02120	-0.307582	0.0859102	0.000139214
AT5G52120	0.286936	0.0858248	0.000140257
AT2G39570	-0.279259	0.0858234	0.000140274
AT4G14130	-0.30589	0.0857311	0.00014141
AT4G35030	-0.292709	0.0856197	0.000142793
AT1G09590	-0.309422	0.0852048	0.000148065
AT1G73020	-0.323582	0.0851679	0.000148543
AT2G30600	0.356485	0.0851318	0.000149013
AT5G10625	0.347763	0.0850354	0.000150274
AT3G19550	-0.315301	0.0848255	0.000153054
N_new_gene_254	-0.34724	0.0847712	0.000153781
AT2G22970	0.285156	0.0845915	0.000156215
AT5G20900	0.295079	0.0844266	0.000158481
AT5G65050	-0.338647	0.0843232	0.000159919
AT3G54810	-0.285159	0.0842418	0.00016106
AT1G53510	-0.293889	0.0842083	0.000161532
AT4G14040	0.326335	0.0841752	0.000161999
AT1G62660	0.321378	0.0838879	0.000166115
AT2G22930	0.337408	0.0837266	0.000168471
AT5G62890	0.33315	0.0835137	0.000171632
AT1G55890	-0.287631	0.0834285	0.000172913
AT5G42650	0.32358	0.0831985	0.000176419
AT2G47650	0.306504	0.0831911	0.000176534
AT4G33380	-0.310589	0.0830494	0.000178731
AT1G60700	-0.316321	0.0826946	0.000184352
AT2G33740	0.265983	0.082636	0.000185296
AT2G21540	0.305037	0.0824742	0.000187932
AT5G10946	-0.272474	0.0823039	0.000190745
AT5G23820	0.296242	0.0822486	0.000191667
AT1G19510	-0.292717	0.0821233	0.000193775
AT5G16610	-0.322108	0.0819964	0.000195931
AT3G11220	-0.31014	0.0819878	0.000196078
AT4G17090	0.328334	0.0819194	0.000197252
AT4G04630	-0.348801	0.0818991	0.000197601
AT1G20510	0.310022	0.0818409	0.000198608
AT2G20950	0.31948	0.0817801	0.000199663
AT2G04050	0.290569	0.0817009	0.000201047
AT1G02970	-0.306769	0.0815966	0.000202885
AT3G16870	-0.309847	0.0815598	0.000203537
AT5G13390	0.304465	0.081436	0.000205746
AT3G22940	0.286441	0.0812421	0.000209257
AT1G15950	0.284184	0.0812053	0.000209928
AT2G38010	0.321198	0.0811408	0.000211114
AT5G22440	-0.294696	0.0811	0.000211865
AT3G02790	-0.28778	0.0808728	0.000216105
AT1G03470	-0.317523	0.0807329	0.000218758
AT3G14600	-0.255484	0.0806651	0.000220055
AT3G02390	-0.299441	0.080608	0.000221153
AT1G11950	-0.315279	0.0804528	0.000224165
AT1G15150	0.266247	0.0803248	0.000226681
AT3G18790	-0.29417	0.0802273	0.000228615
AT5G35740	-0.28094	0.0800997	0.000231173
AT5G47910	0.299089	0.0797503	0.000238322
AT3G45140	0.328813	0.0796964	0.000239444
AT3G46100	-0.310438	0.0796017	0.000241429
AT1G01640	0.302096	0.0795966	0.000241536
AT2G05632	-0.290403	0.0795269	0.000243007
AT3G02920	-0.344025	0.079507	0.000243429
AT4G03390	-0.33031	0.0794434	0.000244782
AT2G16890	0.276765	0.0794276	0.000245119
AT1G66350	0.305359	0.0793263	0.000247293
AT5G24970	-0.313709	0.0792399	0.000249161
AT3G55530	0.299543	0.0791812	0.00025044
AT4G08950	-0.249039	0.0790133	0.000254131
AT4G26560	0.271227	0.0789605	0.000255303
AT5G14580	-0.299899	0.0789433	0.000255685
AT1G19670	0.352213	0.0789127	0.000256367
AT5G23020	0.319244	0.078888	0.00025692
AT5G65740	-0.281936	0.0787338	0.000260395
AT3G60710	-0.268508	0.0786953	0.000261269
AT1G29820	-0.291853	0.0786772	0.000261682
AT3G20540	-0.237474	0.0784145	0.000267739
AT1G14360	0.266482	0.078229	0.000272102
AT1G65700	-0.308176	0.0782234	0.000272234
AT2G05710	0.28918	0.0781783	0.000273305
AT1G20930	-0.303053	0.0781045	0.000275067
AT5G62390	-0.337274	0.0780958	0.000275277
AT1G05010	0.31933	0.078055	0.000276255
AT1G12470	0.29266	0.0780423	0.000276561
AT5G51960	-0.302624	0.0779983	0.000277624
AT5G21060	-0.299643	0.0779958	0.000277684
AT1G16850	-0.289443	0.0776515	0.000286137
AT1G04520	-0.29341	0.0775961	0.00028752
AT1G61150	-0.272727	0.0775685	0.000288214
AT5G52370	-0.296351	0.0775551	0.000288548
AT2G23290	-0.345583	0.0775226	0.000289367
AT1G18745	-0.276275	0.0775044	0.000289825
AT1G19570	0.340903	0.0774543	0.000291092
AT3G47090	0.284667	0.0773476	0.000293809
AT1G11240	-0.328962	0.0772334	0.000296745
AT2G32230	-0.329772	0.0771859	0.000297977
AT1G13350	-0.28637	0.0770475	0.000301587
AT3G04770	-0.31964	0.0770233	0.000302225
AT4TE06880	0.281541	0.0769811	0.000303336
AT1G28360	-0.27255	0.0769638	0.000303795
AT4G32710	-0.324519	0.0767955	0.000308277
AT1G62570	-0.304572	0.0767792	0.000308715
AT3G23050	0.279597	0.0766975	0.00031092
AT4G34290	-0.280121	0.0766647	0.000311808
AT5G36220	0.32368	0.0766213	0.000312987
AT5G42080	0.294953	0.0765701	0.000314386
AT3G62610	-0.347545	0.0765297	0.000315495
AT5G05860	-0.304332	0.0764461	0.000317799
AT1G18270	0.278176	0.0763476	0.000320534
AT4G12030	0.322413	0.0762641	0.000322874
AT4G23640	0.300962	0.0762469	0.000323357
AT5G43050	-0.28509	0.0761247	0.000326814
AT4G17470	0.382905	0.0759106	0.000332963
AT2G28140	-0.299294	0.0758943	0.000333435
AT4G01060	-0.311785	0.0758546	0.000334588
AT4G34790	-0.279736	0.0758489	0.000334754
AT1G14250	0.316538	0.075826	0.000335421
AT5G11170	-0.308701	0.0756467	0.000340697
AT5G65450	-0.309851	0.0754818	0.00034562
AT1G64670	0.332286	0.0752722	0.000351981
AT1G32640	0.32394	0.0749118	0.000363195
AT4G15920	0.312904	0.0747731	0.000367602
AT5G10840	0.290336	0.0747622	0.000367952
AT3G48630	-0.286421	0.0747172	0.000369395
AT1G08830	0.288578	0.0746857	0.000370409
AT4G03110	-0.332281	0.0746298	0.000372213
AT5G10330	-0.265608	0.0746219	0.000372469
AT1G12750	-0.283635	0.0743792	0.000380416
AT1G03660	-0.309783	0.0743072	0.000382808
AT3G48320	0.285469	0.074291	0.000383346
AT5G05390	0.275988	0.0742892	0.000383408
AT1G48635	-0.301294	0.0742581	0.000384446
AT5G54670	-0.276761	0.0741692	0.000387431
AT3G10850	0.294893	0.074118	0.000389157
AT4G09620	-0.285866	0.0741056	0.00038958
AT1G75580	-0.291327	0.0740675	0.00039087
AT3G50740	0.327256	0.0740033	0.000393061
AT5G22880	-0.291811	0.0739928	0.000393421
AT5G52240	0.304044	0.073957	0.000394645
AT5G16150	0.306824	0.0739053	0.000396427
AT1G09010	0.2865	0.0738338	0.000398896
AT5G19340	-0.296822	0.0737832	0.000400658
AT5G52840	0.281826	0.0737418	0.000402104
N_new_gene_245	-0.272096	0.0736635	0.000404849
AT2G14660	-0.250957	0.0736439	0.000405539
AT2G37470	-0.330163	0.0733759	0.000415103
AT5G49615	-0.256796	0.0732911	0.000418176
AT3G28460	-0.252271	0.0732651	0.000419123
AT1G54040	0.315501	0.0732624	0.000419219
AT4G00360	0.297089	0.0732594	0.00041933
AT5G38140	-0.306663	0.0732096	0.000421148
AT5G04980	-0.310151	0.0731829	0.000422126
AT2G38880	-0.302387	0.0731384	0.000423763
AT1G23170	0.308353	0.0731068	0.000424929
AT5G09880	-0.302247	0.0730343	0.000427617
AT3G52920	-0.29856	0.0729631	0.000430271
AT2G01818	-0.303401	0.0729602	0.000430382
AT4G35350	0.277901	0.0728712	0.000433723
AT2G43720	-0.314014	0.0727731	0.00043744
N_new_gene_177	-0.322689	0.0726895	0.000440632
AT4G37090	-0.285031	0.072676	0.000441148
AT1G12640	0.297219	0.0725121	0.00044748
AT3G17820	0.333229	0.0724884	0.000448401
AT2G26740	0.232742	0.0724769	0.00044885
AT4G37870	0.29578	0.0724687	0.000449172
AT2G16790	0.270576	0.0723536	0.000453685
AT5G24160	0.279747	0.0723041	0.000455643
AT5G35120	0.248369	0.0722912	0.000456155
AT1G64970	0.264947	0.0722678	0.000457084
AT1G79340	0.287868	0.0722325	0.00045849
AT5G61290	0.298413	0.0722211	0.000458943
AT4G05390	0.29146	0.0722201	0.000458983
AT5G65990	0.288847	0.0722059	0.00045955
AT1G43790	0.334769	0.0721366	0.000462326
AT4G24510	0.310586	0.0720483	0.000465887
AT5G44620	-0.25348	0.0719694	0.000469093
AT3G23800	0.281163	0.0719241	0.000470946
AT3G55750	-0.28768	0.0719069	0.000471652
AT1G60780	-0.291362	0.0718661	0.000473327
AT1G04870	-0.304418	0.0716802	0.000481037
AT5G57123	-0.294299	0.0716682	0.00048154
AT5G38280	0.283721	0.0715916	0.000484755
AT3G09380	0.330061	0.0715806	0.000485218
AT5G03670	-0.256029	0.0715503	0.000486497
AT1G64740	0.293915	0.0715438	0.00048677
AT3G06700	-0.263322	0.071505	0.000488416
AT5G17510	-0.287271	0.0714516	0.000490686
AT1G74920	0.334874	0.0713526	0.000494928
AT1G27130	0.267245	0.0713162	0.000496497
AT2G41340	-0.284099	0.0712197	0.000500675
AT1G21440	0.314252	0.0712131	0.000500966
AT5G09390	-0.302397	0.0711775	0.000502517
AT5G47240	0.3245	0.0711738	0.000502678
AT1G12050	0.311027	0.07116	0.000503283
AT3G11470	-0.313521	0.0711176	0.000505138
AT3G09980	-0.309662	0.0710878	0.000506451
AT2G41470	0.27262	0.0710053	0.000510094
AT4G14680	0.326439	0.0709664	0.00051182
AT2G30070	-0.333962	0.0709066	0.000514489
AT1G08580	-0.268789	0.0708792	0.000515712
AT4G16680	-0.262732	0.0708737	0.00051596
AT3G54110	0.287774	0.0708657	0.000516321
AT2TE80670	-0.30813	0.0707357	0.000522186
AT2G23760	0.261371	0.0704264	0.00053641
AT2G37190	-0.263938	0.0703778	0.000538676
AT4G31360	-0.271418	0.0703627	0.000539383
AT4G13410	0.270037	0.0703346	0.000540701
AT1G16290	-0.287252	0.0702973	0.000542459
AT1G66340	0.278691	0.0701763	0.000548191
AT5G13930	0.282334	0.0701628	0.000548834
AT5G35750	-0.262206	0.0701616	0.000548893
AT3G11760	-0.284028	0.070051	0.000554194
AT1G29050	0.304594	0.0700059	0.000556366
AT2G43010	0.337126	0.0699576	0.000558707
AT2G32340	-0.299209	0.0699541	0.000558874
AT4G29130	0.281534	0.0697619	0.000568285
AT3G14870	-0.277652	0.0697444	0.000569152
AT5G05560	-0.290318	0.0697274	0.000569993
AT1G09270	0.278481	0.0697168	0.000570517
AT5G11610	0.321994	0.0697107	0.000570821
AT2G40360	-0.262477	0.0696744	0.000572625
AT5G16130	-0.249064	0.0696508	0.000573795
AT2G23050	-0.276089	0.0696287	0.000574902
AT5G36230	-0.278846	0.0695938	0.000576645
AT2G20060	-0.266228	0.0695665	0.000578013
AT1G02630	-0.29356	0.0694147	0.000585687
AT2G35150	-0.280398	0.0693835	0.000587274
AT2G20515	-0.314457	0.069381	0.000587402
AT5G54810	0.264086	0.0693618	0.000588383
AT4G37980	0.317011	0.0692764	0.000592763
AT5G16715	-0.28828	0.069274	0.00059289
AT4G05130	-0.285668	0.0692349	0.000594904
AT1G69400	-0.272795	0.0692028	0.000596566
AT5G11670	0.305054	0.0691614	0.000598717
AT5G06150	-0.296411	0.0691115	0.000601318
AT3G48000	0.279565	0.0691007	0.00060188
AT4G31460	-0.26384	0.0690572	0.00060416
AT4G01037	0.254442	0.0690181	0.000606214
AT1G15550	-0.304505	0.0689609	0.000609236
AT5G61250	0.269764	0.0689516	0.000609726
AT1G06620	0.317403	0.0689224	0.000611273
AT4G09760	0.2743	0.0688308	0.000616156
AT5G47310	-0.283864	0.0688264	0.000616391
AT3G19508	-0.270456	0.0687299	0.000621581
AT5G04800	-0.275022	0.0687042	0.000622972
AT1G51670	-0.286049	0.0685877	0.000629305
AT3G54680	-0.287376	0.0685423	0.000631792
AT3G58220	-0.310647	0.0684968	0.000634294
AT5G19440	0.300303	0.068478	0.000635331
AT5G18500	-0.285954	0.0684761	0.000635433
AT5G16840	0.261894	0.0684542	0.000636642
AT3G13674	-0.292576	0.0683866	0.00064039
AT5G25754	-0.300927	0.068369	0.000641373
AT4G00780	-0.326024	0.0683465	0.000642627
AT5G13225	-0.215233	0.0682424	0.000648462
AT1G09690	-0.296493	0.0682418	0.000648493
AT3G54910	-0.257298	0.0682221	0.000649608
AT1G50480	0.28712	0.0681863	0.000651631
AT5G47810	0.268202	0.0681549	0.000653406
AT1G72180	0.288584	0.0680251	0.000660812
AT1G80960	-0.337615	0.0680148	0.000661404
AT2G34640	-0.241712	0.0679686	0.000664062
AT2G43040	0.251902	0.0679443	0.000665465
AT4G03210	-0.288801	0.0678114	0.000673192
N_new_gene_61	-0.284048	0.0677377	0.000677511
AT3G11500	-0.275834	0.0677174	0.00067871
AT5G64490	-0.307482	0.0676813	0.00068084
AT3G02832	-0.267173	0.0676351	0.000683574
AT3G02090	0.278504	0.0675768	0.000687044
AT4G04885	-0.226475	0.0675743	0.000687195
AT1G45000	0.263652	0.0675162	0.000690669
AT5G09225	-0.268685	0.0674917	0.000692141
AT4G02790	-0.245157	0.0674636	0.000693835
AT1G78850	0.282995	0.0674597	0.000694069
AT2G32765	-0.305479	0.0674405	0.000695224
AT5G32450	-0.256492	0.0674247	0.000696182
AT2G15830	-0.300314	0.0673713	0.000699416
AT1G44830	-0.241463	0.0672062	0.000709512
AT2G23930	-0.289188	0.0670995	0.000716116
AT3G09260	0.289	0.0670843	0.000717063
AT1G71440	0.224291	0.0670598	0.000718592
AT3G50270	0.275309	0.0669398	0.000726116
AT1G27660	-0.257753	0.0668909	0.000729206
AT5G59970	-0.263516	0.0668419	0.00073231
AT2G45160	-0.307825	0.0668263	0.000733306
AT2G44150	-0.265282	0.0668064	0.000734571
AT3G25520	-0.280239	0.0667088	0.000740825
AT5G37510	0.277087	0.0666481	0.000744737
AT5G25780	-0.261774	0.0666259	0.000746177
AT3G53740	-0.287035	0.0666149	0.000746889
AT4G02590	-0.231908	0.0666081	0.00074733
AT2G24180	0.28016	0.0665317	0.000752303
AT3G14650	0.285352	0.0664493	0.000757704
AT1G76790	0.329745	0.0664387	0.000758398
AT4G37150	0.267878	0.0664285	0.000759073
AT3G02640	-0.260526	0.0663681	0.000763064
AT5TE78955	0.266977	0.0663471	0.000764452
AT5G27740	-0.274974	0.0663105	0.000766888
AT3G13000	-0.284537	0.0662908	0.0007682
AT5G16650	-0.292579	0.0662872	0.000768439
N_new_gene_185	-0.270613	0.0662753	0.000769234
AT3G51230	-0.29288	0.0662259	0.000772543
AT3G18210	-0.321252	0.0662246	0.000772625
AT4G38510	0.293741	0.0662243	0.000772649
N_new_gene_339	0.272336	0.0662232	0.000772721
AT3G55130	0.292141	0.0662182	0.000773057
AT2G31150	-0.274333	0.0662103	0.000773586
AT4G16180	0.279334	0.0661989	0.000774354
AT3G48740	0.319621	0.0660873	0.000781892
AT4G14880	0.298393	0.0660353	0.000785428
AT5G15220	-0.282675	0.0660346	0.000785476
AT1G68050	0.309758	0.0659756	0.000789512
AT4G25315	-0.287405	0.0659273	0.00079283
AT1G02730	-0.271773	0.0658911	0.000795325
AT4G35570	-0.261444	0.0658827	0.0007959
AT1G20620	0.294721	0.0658467	0.000798395
N_new_gene_186	-0.284623	0.0658275	0.000799722
AT5G35735	0.282282	0.0657934	0.000802096
AT1G03550	-0.250796	0.0657712	0.000803642
AT3G46970	0.303247	0.0657636	0.000804171
AT1G53860	-0.285749	0.0657553	0.000804753
AT1G11400	-0.280378	0.0657267	0.000806756
AT4G34400	-0.280129	0.0656996	0.000808653
AT4G15490	0.257672	0.0656695	0.000810767
AT1G14410	-0.271304	0.0656592	0.000811497
AT4G28706	0.312684	0.0656445	0.000812531
AT3G60390	-0.352356	0.0655864	0.000816639
AT1G64880	-0.277112	0.065532	0.000820505
AT4G19985	-0.277197	0.0655078	0.000822232
AT5G04110	-0.261351	0.0654907	0.000823452
AT5G18770	-0.266953	0.0653472	0.000833769
AT1G10980	-0.225863	0.0652921	0.000837766
AT3G62830	0.252448	0.0652671	0.000839589
AT4G25320	-0.271348	0.0652528	0.000840631
AT3G48170	0.266751	0.065181	0.000845883
AT3G30180	-0.247346	0.065104	0.000851555
AT1G64200	0.304248	0.0650974	0.000852048
AT3G46030	-0.280363	0.0650952	0.000852209
AT5G04690	-0.262391	0.0650333	0.000856799
AT3G22330	0.270171	0.065032	0.000856897
AT2G18900	-0.264346	0.0648982	0.000866908
AT1G18075	-0.319349	0.0648975	0.000866956
AT1G74453	-0.250644	0.0648916	0.000867406
AT5G43940	0.256225	0.0648847	0.000867925
AT3G47500	0.291729	0.0648341	0.000871743
AT5G04590	0.273226	0.0648165	0.000873077
AT5G59600	-0.288226	0.064787	0.000875313
AT4G29410	-0.232581	0.0647817	0.000875714
AT5G03340	0.25808	0.0647626	0.000877169
AT5G25590	-0.272178	0.064749	0.000878206
AT1G21670	0.298961	0.0647413	0.000878791
AT4G11911	0.29614	0.0647158	0.000880738
AT5G18970	-0.257634	0.0646859	0.000883025
N_new_gene_174	-0.263494	0.0646477	0.000885962
AT2G24820	0.281234	0.0646369	0.000886791
AT1G69040	-0.256626	0.0646308	0.00088726
AT2G24270	0.279053	0.0645494	0.000893554
AT1G53542	-0.224851	0.0645394	0.000894326
AT3G62960	-0.280922	0.064479	0.00089903
AT5G55580	-0.233215	0.0644453	0.000901661
AT5G10240	-0.285254	0.0643456	0.000909494
AT2G44100	0.270127	0.0643222	0.00091134
AT3G58975	-0.273772	0.0643013	0.000912999
AT2G27550	-0.237859	0.0642781	0.000914841
AT5G08185	-0.278829	0.0642772	0.000914909
AT3G48690	0.263205	0.0642685	0.000915602
AT3G46320	-0.27619	0.064232	0.000918507
AT5G18407	-0.298284	0.0642198	0.000919478
AT1G23880	-0.299313	0.0641399	0.000925873
AT1G08360	-0.255621	0.0640941	0.000929563
AT2G33990	-0.273758	0.064063	0.000932078
AT3G04720	0.318911	0.0640506	0.000933084
AT4G31700	-0.24649	0.0639978	0.000937362
AT4G23750	-0.275073	0.0639893	0.000938059
AT2G20370	0.256622	0.0637702	0.000956064
AT3G47348	-0.213202	0.0637551	0.000957315
AT4G26970	0.277203	0.0635884	0.000971268
AT5G44050	0.264008	0.0635403	0.000975329
AT1G52280	-0.326136	0.0635113	0.00097779
AT5G39860	0.306863	0.0634624	0.000981944
AT4G23100	0.274521	0.0633197	0.000994181
AT1G25220	0.253582	0.0632865	0.00099705
AT2G38500	0.28194	0.0632728	0.000998233
AT5G27440	-0.224377	0.0632215	0.00100268
AT4G34660	-0.279783	0.0632042	0.00100419
AT5G13140	0.268099	0.0631917	0.00100528
AT2G45290	0.276013	0.0631674	0.00100741
AT3G49950	-0.266206	0.0631387	0.00100992
AT4G19630	-0.190876	0.063122	0.00101138
AT3G10610	-0.239909	0.0631165	0.00101187
AT5G07080	0.258736	0.0630943	0.00101382
AT2G26860	-0.273642	0.0630819	0.00101491
AT5G56710	-0.274889	0.0630355	0.00101901
AT3G02700	0.289583	0.062997	0.00102241
AT5G52540	0.251064	0.0629791	0.001024
N_new_gene_124	-0.228074	0.0629562	0.00102604
AT1G72730	-0.234702	0.0629207	0.00102921
AT3G56070	-0.280482	0.0629023	0.00103085
AT5G59440	-0.293453	0.062897	0.00103133
AT5G58990	-0.266892	0.0628113	0.00103902
AT5G54170	0.26909	0.0628072	0.00103939
AT3G16690	0.268024	0.0627294	0.00104643
AT4G36930	0.241339	0.0626423	0.00105437
AT1G34010	-0.306368	0.0625894	0.00105922
AT3G02510	0.267086	0.0625698	0.00106102
AT5G49650	0.241962	0.0624456	0.00107252
AT2G22942	0.260392	0.0624366	0.00107336
AT1G05310	0.273128	0.0624256	0.00107438
AT5G05330	-0.248614	0.0624102	0.00107582
AT4G29030	-0.297601	0.0624057	0.00107624
AT1G45010	0.300226	0.0623913	0.00107758
AT1G04310	-0.275276	0.0623723	0.00107936
AT4G39980	0.312864	0.062312	0.00108503
N_new_gene_423	-0.275397	0.0623063	0.00108557
AT4G10300	-0.276216	0.0622819	0.00108787
AT2TE00710	-0.233518	0.062223	0.00109344
AT3G45750	-0.278299	0.0622098	0.00109469
AT1G16635	-0.208829	0.0621891	0.00109666
AT4G15660	-0.268414	0.0621876	0.0010968
AT3G47960	0.279012	0.0621643	0.00109902
AT3G06680	-0.281463	0.0621195	0.0011033
AT1G49480	-0.305938	0.0620514	0.00110984
AT3G09090	0.279643	0.0618952	0.00112499
N_new_gene_301	-0.223887	0.0618863	0.00112586
AT4G02405	0.26488	0.0618838	0.0011261
AT5G62990	-0.284675	0.0618786	0.00112661
AT5G11200	-0.264938	0.0616982	0.00114438
AT3G55830	0.253997	0.0616934	0.00114485
AT1G52340	0.273393	0.0616918	0.00114502
AT1G07230	0.261893	0.061603	0.00115387
AT5G34830	-0.28969	0.0615839	0.00115579
AT5G15750	-0.268892	0.0614817	0.00116608
AT5G12410	-0.260482	0.0614596	0.00116832
AT5G58390	0.321291	0.0614429	0.00117002
AT2G43050	0.246089	0.0614343	0.00117088
AT1G51355	-0.257888	0.0613216	0.00118239
AT5G64330	0.27329	0.0612654	0.00118818
AT1G72120	0.254475	0.0612091	0.00119399
AT3G44290	0.180426	0.0612046	0.00119445
AT5G48300	0.262359	0.0610787	0.00120758
AT1G14810	0.25873	0.0609582	0.00122027
N_new_gene_167	-0.249105	0.0609307	0.00122318
AT2G40670	-0.25878	0.0608954	0.00122693
AT2G39940	0.274868	0.0608825	0.00122831
AT2G07750	0.260414	0.0608502	0.00123175
AT5G11810	0.24075	0.0608457	0.00123224
AT5G55260	-0.294095	0.0608354	0.00123334
AT3G61130	0.272774	0.0608216	0.00123482
AT4G32510	0.251803	0.0608111	0.00123594
AT1G18360	0.27314	0.0607237	0.00124535
AT3G28455	-0.273759	0.0607089	0.00124695
AT3G01316	-0.292913	0.0606216	0.00125643
AT2G17845	0.227846	0.0605904	0.00125984
AT5G50970	-0.280574	0.0605899	0.0012599
AT4G14660	-0.276546	0.0605601	0.00126315
AT3G62580	0.285365	0.0605293	0.00126653
AT5G09950	-0.258577	0.0605207	0.00126748
AT2G35382	-0.237959	0.0605044	0.00126927
AT2G42485	-0.239364	0.0604879	0.00127109
AT3G06530	-0.262592	0.0604608	0.00127409
AT1G62930	-0.234215	0.0604126	0.00127942
AT3G18170	0.273534	0.0603896	0.00128197
AT2G04520	-0.253542	0.0603886	0.00128209
AT1G55260	0.281222	0.06038	0.00128305
AT5G17550	-0.299291	0.0603719	0.00128395
AT4G38770	0.277994	0.0603653	0.00128468
AT2G46370	0.292661	0.0603441	0.00128705
AT1G52930	-0.289839	0.060314	0.00129042
AT1G17420	0.287054	0.0602168	0.00130134
AT3G26560	-0.272139	0.0602048	0.0013027
AT1G31780	0.266797	0.060147	0.00130925
AT2G38180	-0.277677	0.0601448	0.0013095
AT4G01690	0.278532	0.0600926	0.00131544
AT1G26820	0.238299	0.0600592	0.00131926
AT5G52320	0.272937	0.0600329	0.00132227
AT1G18800	-0.2746	0.0599895	0.00132726
AT5G24470	0.296253	0.0599653	0.00133005
AT2G01760	-0.263815	0.0598997	0.00133764
AT2G40020	-0.268733	0.0598783	0.00134013
AT1G16300	-0.268473	0.0598154	0.00134746
AT3G12930	-0.242645	0.0597857	0.00135094
N_new_gene_421	-0.271375	0.0597087	0.00135999
AT2G26550	-0.260412	0.0596621	0.00136551
AT2G05100	0.330093	0.0596196	0.00137055
AT4G00710	-0.242139	0.0595798	0.00137529
AT4G36791	-0.227762	0.0595713	0.00137631
AT5G48335	-0.316641	0.0595562	0.00137811
AT5G17210	-0.291551	0.059552	0.00137861
AT1G09160	-0.198634	0.0595022	0.00138458
AT1G59990	-0.299388	0.0594951	0.00138544
AT3G16780	-0.270704	0.0594899	0.00138605
AT1G07140	0.26052	0.0594718	0.00138824
AT1G15690	0.26649	0.0594634	0.00138925
AT3G63470	0.243189	0.0594288	0.00139342
AT1G16430	-0.293064	0.0594241	0.00139399
AT1G19830	-0.276736	0.0594107	0.00139562
AT1G75900	0.255807	0.0593939	0.00139765
AT2G44930	0.257148	0.0592844	0.00141099
AT1G31010	-0.282226	0.0592663	0.00141322
AT1G48440	0.263115	0.0592542	0.0014147
AT1G07070	-0.278661	0.0592484	0.00141541
AT3G18190	-0.234845	0.0592301	0.00141765
AT3G10920	0.254773	0.0592264	0.00141812
AT1G23740	0.280827	0.0591743	0.00142454
AT4G34555	-0.264498	0.0591715	0.00142489
AT2G33540	-0.260413	0.0591352	0.00142938
N_new_gene_274	-0.288405	0.0590624	0.00143844
AT1G76400	0.249264	0.0590397	0.00144127
AT5G62940	-0.221253	0.0589971	0.00144661
AT3G44450	0.255545	0.058993	0.00144713
AT2G35020	-0.265558	0.0589612	0.00145112
AT2G31970	-0.237374	0.0589573	0.00145162
AT5G21105	0.286575	0.0589091	0.0014577
AT5G12950	0.276584	0.0588335	0.00146729
AT1G34360	0.265621	0.058793	0.00147246
AT4G35930	-0.259046	0.0587675	0.00147572
AT1G72430	-0.217885	0.0587654	0.00147598
AT5G14280	0.263936	0.0586995	0.00148444
AT1G22350	0.259148	0.0586685	0.00148844
AT5G07090	-0.232918	0.0586524	0.00149053
AT2G33530	0.235418	0.0586149	0.00149538
AT3G50960	-0.208994	0.0586136	0.00149555
AT1G64563	-0.24664	0.0585207	0.00150765
AT3TE43350	-0.239247	0.0584809	0.00151288
AT1G55920	0.274061	0.0584536	0.00151646
AT1G43800	0.23437	0.0584395	0.00151831
AT1G44575	0.267121	0.0584345	0.00151897
AT4G30530	0.280318	0.0583994	0.0015236
AT3G59010	0.27873	0.0583816	0.00152597
AT4G11290	0.280613	0.0583577	0.00152913
AT5G48990	-0.283584	0.0583361	0.00153201
AT2G47620	-0.248505	0.0583015	0.00153661
AT5G51890	0.253359	0.0582571	0.00154253
N_new_gene_102	-0.275764	0.0582449	0.00154417
AT5G02450	-0.244544	0.058204	0.00154966
AT2G34520	-0.255641	0.0581745	0.00155363
AT5G52882	-0.24426	0.0581727	0.00155388
AT4G32940	0.288525	0.0581372	0.00155867
AT3G18080	0.293058	0.0580916	0.00156484
AT5G66590	0.317232	0.0580461	0.00157104
AT1G25260	-0.256608	0.0579511	0.00158403
AT3G13060	0.254386	0.0578877	0.00159278
AT1G08780	-0.265483	0.0578742	0.00159465
AT5G41870	0.26901	0.0578461	0.00159854
AT1G04490	0.213061	0.0578396	0.00159944
AT1G13880	-0.283628	0.0577976	0.00160528
AT3G60250	-0.272365	0.057714	0.00161697
AT2G42300	-0.244284	0.0576573	0.00162495
AT2G24560	-0.23331	0.0576542	0.00162538
AT5G19740	-0.254231	0.0576478	0.00162628
AT3G18980	0.227852	0.0575785	0.00163609
AT3G49410	-0.291211	0.0575684	0.00163752
AT3G13772	0.247692	0.057501	0.00164713
AT5G42270	0.262309	0.057486	0.00164928
AT1G56550	0.23764	0.057478	0.00165042
AT2G16750	-0.250703	0.0574003	0.00166158
AT1G05805	0.240565	0.0573838	0.00166396
AT1G29370	0.250082	0.0573612	0.00166723
AT4G37022	0.269386	0.0573006	0.00167603
AT3G26744	-0.262855	0.0572966	0.0016766
AT1G70090	-0.242781	0.0572858	0.00167817
AT1G80660	0.265459	0.0572854	0.00167824
AT5G48880	0.263917	0.0572312	0.00168615
AT3G43790	0.234749	0.0572099	0.00168926
AT5G41550	0.262703	0.0572049	0.00169
AT1G02610	-0.297179	0.0571517	0.00169782
AT5G18930	-0.216075	0.0571392	0.00169966
AT5G17690	-0.248287	0.0571302	0.00170098
AT1G53070	-0.244844	0.0570901	0.00170691
AT1G31550	0.248005	0.0570634	0.00171088
AT3G27025	-0.237783	0.0570561	0.00171196
AT5G17990	0.247491	0.0570487	0.00171306
AT3G52050	-0.26207	0.0570249	0.0017166
AT2G32810	0.266557	0.0570043	0.00171967
AT5G13720	0.256937	0.0569884	0.00172204
AT2G46192	-0.279893	0.0569814	0.0017231
AT2G32710	-0.258213	0.0569728	0.00172438
AT1G67620	-0.256453	0.0569517	0.00172755
AT3G59950	0.262231	0.0568806	0.00173823
AT2G43700	-0.260573	0.0568766	0.00173883
AT4G30660	0.29972	0.0568346	0.00174519
AT3G54760	-0.242702	0.0568086	0.00174913
AT3G54960	0.270946	0.0567764	0.00175403
AT5G54690	0.230529	0.0567652	0.00175573
AT1G44446	0.300191	0.0567569	0.00175699
AT1G50460	-0.227206	0.0567217	0.00176237
AT2G47680	0.23734	0.0566913	0.00176701
AT5G66600	-0.263061	0.0566659	0.00177091
AT2G27980	-0.24891	0.0566505	0.00177329
N_new_gene_180	0.260064	0.0566056	0.00178022
AT1G13609	-0.219467	0.0565943	0.00178196
AT4G16447	-0.300288	0.0565809	0.00178402
AT3G14190	-0.268903	0.0565572	0.0017877
AT5G20810	0.237357	0.0565398	0.00179041
AT2G29125	-0.234708	0.0564978	0.00179694
AT3G22200	0.270373	0.0564957	0.00179727
AT3G09470	0.286592	0.0564844	0.00179903
AT2G24190	0.234623	0.056474	0.00180066
AT3G63410	0.253523	0.0564432	0.00180548
AT5G06680	-0.25873	0.0564412	0.00180579
AT3G56130	-0.236433	0.056417	0.00180958
AT2G35830	-0.232689	0.0563384	0.00182197
AT1G14060	-0.292992	0.0562942	0.00182897
AT5G61880	-0.245986	0.0562894	0.00182974
AT1G70770	0.247351	0.0562617	0.00183413
AT1G29660	0.258126	0.0562595	0.00183448
AT1G47970	-0.263038	0.0562412	0.0018374
AT5G22875	-0.26144	0.0561871	0.00184606
AT4G35905	-0.266944	0.0561766	0.00184773
AT2G23690	-0.259225	0.0561469	0.0018525
AT4G30180	-0.292922	0.0561108	0.00185832
AT3G43440	-0.276513	0.0561081	0.00185876
AT2G39310	0.282049	0.0561076	0.00185882
AT5G55330	-0.208569	0.0561043	0.00185937
AT1G68720	-0.247966	0.0560395	0.00186985
AT1G20090	-0.264076	0.0560248	0.00187224
AT2G43100	0.267754	0.0559849	0.00187873
AT1G73680	0.244706	0.0559712	0.00188096
AT2G04400	0.249573	0.0559561	0.00188344
AT3G22620	0.247265	0.0559523	0.00188405
AT1G33475	-0.218967	0.055906	0.00189163
AT2G30370	-0.246977	0.055905	0.0018918
AT1G23220	-0.27236	0.0558293	0.00190427
AT1G26750	0.214021	0.0558223	0.00190543
AT1G65960	0.279704	0.0558186	0.00190604
AT5G16760	-0.260275	0.0557736	0.00191349
N_new_gene_187	-0.221402	0.0557599	0.00191578
AT5G54890	-0.26246	0.0557462	0.00191805
AT2G27340	-0.258281	0.055638	0.00193614
AT5G60200	-0.235295	0.0556097	0.00194091
AT3G14220	0.276106	0.0555896	0.00194429
AT5G56190	-0.256082	0.0555707	0.00194749
AT5G13780	0.245779	0.0555678	0.00194798
AT2G37600	-0.260162	0.0555533	0.00195043
N_new_gene_313	-0.253184	0.0555283	0.00195468
AT5G56010	-0.307854	0.0555094	0.00195788
AT5G01350	-0.288798	0.0554222	0.00197275
AT4G30690	-0.216219	0.0554075	0.00197527
AT4G11270	0.269264	0.0554035	0.00197595
AT2G27880	-0.263935	0.0552745	0.00199821
AT5G65750	0.257504	0.0552336	0.00200531
AT1G69620	-0.254419	0.0552233	0.00200711
AT1G17255	-0.279353	0.0551891	0.00201307
AT4G34340	-0.285777	0.055183	0.00201414
AT1G43850	0.255988	0.0551314	0.00202318
AT1G49410	-0.248256	0.0551286	0.00202367
AT5G62230	-0.206437	0.0551259	0.00202415
AT3G23390	-0.246873	0.0550922	0.00203007
AT1G28090	-0.229349	0.0550648	0.0020349
AT1G18400	-0.206453	0.0550607	0.00203563
AT5G66230	-0.286282	0.0550438	0.00203863
AT2G40730	0.261251	0.0550214	0.00204258
N_new_gene_322	-0.277336	0.055004	0.00204568
AT1G29670	0.266668	0.0549384	0.00205735
AT1G22030	-0.203672	0.0549186	0.0020609
AT2G16340	0.275456	0.0549161	0.00206135
AT5G61400	-0.240796	0.0549117	0.00206213
AT4G19410	0.25589	0.0548932	0.00206544
AT3G61950	-0.274698	0.0548764	0.00206846
AT3G50210	-0.296007	0.0548733	0.002069
AT4G13550	-0.230154	0.0548281	0.00207715
AT5G67580	0.274583	0.0547904	0.00208394
AT5G35375	-0.204804	0.0547183	0.00209703
AT5G62030	-0.278674	0.0547063	0.00209921
AT1G35140	-0.213573	0.0546938	0.00210151
AT3G51450	0.258754	0.0546899	0.0021022
AT1G60990	0.2535	0.0546312	0.00211294
AT4G18905	-0.246657	0.0545898	0.00212056
AT3G06610	-0.240304	0.0545739	0.00212348
AT1G59600	-0.245767	0.0544933	0.0021384
AT1G56710	0.258033	0.0544928	0.00213849
AT1G55340	-0.274658	0.0544197	0.00215209
AT5G26030	0.235141	0.0543644	0.00216246
AT1G32583	-0.212057	0.0543581	0.00216363
AT5G19430	-0.308169	0.0543183	0.00217113
AT5G64830	-0.256429	0.054245	0.00218499
AT1G32100	0.241957	0.0542243	0.0021889
AT1G14010	0.238786	0.0542148	0.00219072
AT5G47130	0.265567	0.0542016	0.00219323
AT2G37370	0.262943	0.0541785	0.00219763
AT5G63180	0.26868	0.0541745	0.00219839
AT1TE79760	-0.235912	0.0540811	0.00221629
AT1G29850	-0.289571	0.0540381	0.00222457
AT5G62700	-0.244412	0.0540055	0.00223089
AT1G69370	0.255097	0.0539584	0.00224002
AT5G18110	0.254786	0.0539422	0.00224319
AT1G21560	-0.22892	0.0539276	0.00224602
AT2G39390	-0.266389	0.0538924	0.0022529
AT1G55960	-0.24498	0.0537856	0.00227388
AT5G20890	-0.24746	0.0537854	0.00227392
AT4G29730	-0.265374	0.0537614	0.00227867
AT3G57160	-0.228227	0.0537257	0.00228573
AT4G33510	0.259237	0.0536502	0.00230077
AT4G30150	-0.220453	0.0536326	0.00230428
AT1G17820	0.241763	0.053606	0.00230961
N_new_gene_119	-0.298981	0.0536038	0.00231006
AT5G30495	-0.233152	0.0535722	0.0023164
AT3G24480	0.261169	0.0535536	0.00232014
AT1G53840	0.253994	0.0535448	0.00232192
AT5G48360	-0.273322	0.0535348	0.00232393
AT5G66360	-0.299955	0.0535055	0.00232986
AT2G03620	-0.2644	0.0535047	0.00233002
AT4G39940	0.280321	0.0535001	0.00233094
AT2G20490	-0.239513	0.0534964	0.0023317
AT5G63790	0.236482	0.0534753	0.00233597
AT1G69010	-0.233723	0.0534592	0.00233924
AT5G18920	-0.237607	0.0534316	0.00234485
AT5G53090	-0.265581	0.0534228	0.00234664
AT2G42885	-0.271955	0.053408	0.00234966
AT5G15760	-0.283995	0.0534018	0.00235093
AT1G04040	0.241575	0.0533346	0.00236468
AT5G46110	0.268501	0.0533258	0.00236648
AT4G38480	-0.285639	0.0533241	0.00236683
AT1G52290	-0.234154	0.0532915	0.00237354
AT5G15430	-0.261332	0.0532213	0.00238805
AT3G20190	-0.285432	0.0532101	0.00239038
AT1G66580	-0.257714	0.0531949	0.00239354
AT3G53370	-0.237909	0.0531934	0.00239385
AT1G51760	0.240802	0.053186	0.00239538
AT3G43833	0.269631	0.0531538	0.00240209
AT1G05710	-0.259004	0.0531033	0.00241264
AT5G64310	-0.217555	0.0530725	0.00241911
AT5G14000	-0.245039	0.0530315	0.00242774
AT3G30390	0.27084	0.0530034	0.00243367
AT1G17745	0.227768	0.0529804	0.00243854
N_new_gene_323	-0.201442	0.0529658	0.00244162
AT1G18880	0.277229	0.0529641	0.00244198
AT2G20723	-0.243329	0.052923	0.00245072
AT1G64600	-0.237261	0.0529196	0.00245145
AT2G27400	-0.296315	0.0529141	0.00245262
AT1G12420	-0.237042	0.0529099	0.00245352
AT3G16910	0.239467	0.0529069	0.00245415
AT2G05830	0.235004	0.052885	0.00245881
AT1G34110	-0.24574	0.0528805	0.00245978
AT2G34560	0.294247	0.0528569	0.00246483
AT3G53210	-0.231754	0.0528396	0.00246853
AT3G27520	-0.275088	0.0528387	0.00246872
AT1G49400	-0.244126	0.0528198	0.00247278
AT3G20560	0.248814	0.0528036	0.00247625
AT3G56200	0.245884	0.0527811	0.0024811
AT5G05760	0.239408	0.0527516	0.00248747
AT2G42790	0.242424	0.0527094	0.0024966
AT4G35783	-0.268586	0.0526878	0.00250128
AT1G31710	0.273491	0.0526822	0.0025025
AT5G04850	0.238653	0.0526714	0.00250485
AT4G18425	0.203293	0.0526645	0.00250635
AT5G58140	0.267127	0.0526321	0.0025134
AT3G50970	-0.220341	0.0526244	0.00251508
AT1G03250	-0.29021	0.0526213	0.00251577
AT4G33950	-0.28057	0.052613	0.00251759
AT4G12600	-0.224675	0.0526077	0.00251874
AT3G48350	0.221102	0.052558	0.00252963
AT3G17440	-0.26183	0.0525511	0.00253116
AT3G02540	0.273439	0.0525482	0.00253179
AT2G28130	-0.253561	0.0525225	0.00253744
AT3G59580	-0.218364	0.0524973	0.002543
AT3G19490	0.262286	0.0524959	0.00254331
AT5G07680	-0.272327	0.0524533	0.00255275
AT5G43880	-0.263137	0.0524357	0.00255665
AT1G56590	-0.265459	0.0524271	0.00255855
AT2G01340	0.222449	0.0524097	0.00256241
N_new_gene_17	-0.228998	0.0523992	0.00256476
AT4G08395	0.261534	0.0523908	0.00256663
AT2G05117	-0.249652	0.0523849	0.00256796
AT1G51380	-0.260009	0.0523661	0.00257215
AT3G57140	-0.26649	0.0523435	0.00257719
AT4G28360	-0.222356	0.0523103	0.00258464
AT5G13550	0.226892	0.0522764	0.00259225
AT5G66140	0.26281	0.0522548	0.00259712
AT2G42530	-0.215029	0.0522319	0.00260229
AT1G14140	-0.236381	0.052226	0.00260364
AT2G30950	0.253483	0.0521964	0.00261033
AT5G63190	0.247006	0.0521849	0.00261294
AT2G43920	-0.254378	0.0521709	0.00261612
AT4G15075	-0.243284	0.0521218	0.00262729
AT1G49040	0.252551	0.052114	0.00262908
AT1G70600	-0.221843	0.052101	0.00263204
AT5G26000	0.280733	0.0520851	0.00263568
AT1G70330	0.277348	0.0520359	0.00264698
AT1G62800	0.250385	0.052033	0.00264763
AT3G02140	-0.221091	0.052015	0.00265179
AT1G72670	-0.23376	0.052014	0.00265201
AT2G21150	-0.245246	0.0519925	0.00265697
AT1TE70390	-0.27282	0.0519803	0.00265979
AT1G17100	0.24329	0.0519651	0.0026633
N_new_gene_34	0.244538	0.0519648	0.00266337
AT5G49220	-0.208767	0.0519643	0.00266349
N_new_gene_87	-0.241534	0.0519603	0.0026644
AT1G62700	-0.22044	0.0519587	0.00266478
AT5G63890	0.248093	0.0519397	0.00266917
AT5G16480	-0.293859	0.0519308	0.00267123
AT1G20380	-0.29425	0.0519257	0.00267243
AT5G20635	-0.249997	0.0519224	0.0026732
AT1G68650	0.233257	0.0519145	0.00267504
AT3G58990	0.268627	0.0519057	0.00267706
AT4G17030	0.260074	0.0519056	0.00267708
AT1G22430	-0.181981	0.0518996	0.00267848
AT1G30820	-0.192244	0.0518581	0.00268817
AT5G38070	-0.232205	0.0518315	0.00269439
N_new_gene_416	-0.23521	0.0518176	0.00269762
AT4G37750	-0.234614	0.0518154	0.00269815
AT5G01910	-0.272304	0.0517719	0.00270836
AT5G49000	-0.228975	0.0517282	0.00271867
AT2G44350	0.247575	0.0516636	0.00273397
AT1G28250	-0.208658	0.051661	0.00273458
AT1G67000	0.255008	0.0516606	0.00273468
AT1G32320	-0.224241	0.0516244	0.00274329
AT3G24503	0.234367	0.0515886	0.00275183
AT5G04275	-0.264611	0.0515476	0.00276165
AT3G17810	0.230253	0.0515392	0.00276367
AT5G20010	0.245642	0.0515381	0.00276393
AT3G03880	-0.288172	0.0515353	0.00276459
AT3G19760	-0.257589	0.051524	0.00276732
AT2G42120	-0.236873	0.0515011	0.00277282
AT4G15210	0.328943	0.0514784	0.0027783
AT2G37630	-0.249161	0.0514694	0.00278048
AT4G38010	-0.240864	0.0514653	0.00278146
AT1G01970	-0.28167	0.0514579	0.00278324
AT1G21640	0.264055	0.0514059	0.00279584
AT3G53850	-0.225258	0.0513746	0.00280347
AT3G62160	0.256382	0.0513628	0.00280632
AT3G61470	0.273623	0.051361	0.00280677
AT2G31890	-0.2478	0.05134	0.0028119
AT1G78320	-0.248545	0.0513394	0.00281204
AT5G10610	0.269391	0.0513261	0.00281528
AT3G27190	0.241814	0.0512962	0.00282261
AT4G12900	0.284896	0.0512122	0.00284328
AT5G45700	-0.257308	0.0511903	0.00284869
AT1G10070	0.257273	0.0511782	0.00285169
AT1G79920	0.258171	0.0511634	0.00285536
AT1G71040	0.238167	0.0511566	0.00285704
AT2G46170	0.235894	0.0511244	0.00286504
AT4G28190	-0.292719	0.0510819	0.00287565
AT5G44400	0.281979	0.0510792	0.00287634
AT1G17350	-0.249498	0.0510589	0.0028814
AT5G42990	-0.232687	0.0510396	0.00288624
AT1G64660	0.293904	0.0510282	0.00288909
AT5G53160	-0.296825	0.0510248	0.00288996
AT2G33330	-0.229248	0.0510181	0.00289165
AT3G12970	-0.244317	0.0510145	0.00289254
AT5G22030	-0.241561	0.0510124	0.00289308
AT4G28140	0.260325	0.0510097	0.00289376
AT3G19480	0.249576	0.0510022	0.00289564
AT4G15950	-0.289166	0.051001	0.00289593
AT5G43020	-0.250947	0.0509895	0.00289883
AT1G22800	0.259058	0.0509711	0.00290346
AT5G10572	-0.240151	0.050872	0.00292857
AT5G20480	0.260613	0.0508608	0.00293141
AT5G58920	-0.284512	0.0508579	0.00293216
AT5G28850	-0.264854	0.0508479	0.0029347
AT4G19220	-0.244788	0.0508444	0.00293561
AT1G13608	-0.243509	0.0508431	0.00293594
AT1G48450	0.254528	0.0508412	0.00293642
AT2G17350	-0.292661	0.0508342	0.0029382
AT4G05050	-0.159464	0.0508186	0.0029422
AT1G31173	-0.2121	0.050818	0.00294235
AT1G47395	-0.20941	0.0508037	0.002946
AT5G42190	0.236597	0.0507893	0.00294969
AT1G68945	-0.306259	0.050764	0.00295618
AT5G38430	-0.245406	0.0507575	0.00295784
AT3G60890	-0.25747	0.050751	0.00295952
AT3G11120	-0.232229	0.0507416	0.00296194
AT3G05910	0.24957	0.0507063	0.00297104
AT5G50450	0.230524	0.0506978	0.00297323
AT3G52850	0.230399	0.050677	0.0029786
AT5G62680	0.233778	0.0506463	0.00298656
AT2G25880	-0.268278	0.0506308	0.00299059
N_new_gene_58	-0.235489	0.0506155	0.00299456
AT3G58510	0.200391	0.0506116	0.0029956
AT1G51055	-0.240565	0.05059	0.0030012
AT2G05518	-0.243122	0.0505599	0.00300907
N_new_gene_384	-0.225586	0.0505579	0.00300959
AT5G62790	0.251489	0.0505433	0.00301341
AT5G39030	-0.226693	0.0505176	0.00302016
AT1G08640	-0.249424	0.0504659	0.00303376
AT5G22050	-0.239266	0.050431	0.00304296
AT1G01020	-0.229853	0.0504166	0.00304678
AT2G47610	-0.24428	0.0504158	0.00304698
AT1G48610	-0.270674	0.0503715	0.00305874
AT4G24940	-0.256781	0.0503176	0.00307308
AT1G44790	0.247249	0.0503115	0.00307473
AT5G51640	0.220574	0.0502501	0.00309118
AT5G01250	0.265063	0.0502459	0.00309231
AT1G47603	0.236862	0.050231	0.00309632
AT3G55880	0.230948	0.050198	0.0031052
AT4G02880	0.214562	0.0501847	0.00310878
AT5G17010	0.201283	0.0501805	0.00310992
AT1G05230	0.291036	0.0501768	0.00311093
AT3G22760	-0.242471	0.0501764	0.00311102
AT3G20865	-0.282237	0.050172	0.00311221
AT4G03260	0.25917	0.0501104	0.00312893
AT1G19300	0.234973	0.0501056	0.00313022
AT5G13100	-0.262231	0.0500989	0.00313206
AT1G10700	0.2483	0.0500908	0.00313427
AT3G10970	-0.222858	0.050087	0.00313529
AT5G16550	0.265129	0.0500821	0.00313664
AT5G45950	0.21793	0.0500795	0.00313735
AT3G10350	0.241913	0.0500652	0.00314124
AT5G06265	-0.225404	0.0500619	0.00314214
AT1G31020	-0.235066	0.0500203	0.00315352
AT4G12740	-0.229316	0.050012	0.00315581
AT2G43460	-0.238855	0.0499999	0.0031591
AT4G36970	0.230741	0.0499984	0.00315952
AT5G64480	-0.317776	0.0499692	0.00316756
AT1G48850	0.235708	0.0499678	0.00316795
AT5G18580	0.232776	0.0499613	0.00316974
AT3G28420	-0.285414	0.0499597	0.00317017
AT4G38120	0.269581	0.0498845	0.00319095
AT2G47890	0.259044	0.0498737	0.00319395
AT4G00755	-0.241627	0.0498255	0.00320735
AT1G75350	-0.243765	0.0498226	0.00320816
AT3G06910	-0.286142	0.0498225	0.0032082
AT2G20810	0.269031	0.0498132	0.00321078
AT5G05365	-0.23642	0.0498128	0.00321091
AT3G57730	-0.283687	0.0497861	0.00321837
AT4G14150	-0.232346	0.0497837	0.00321903
AT5G36880	0.256233	0.0497506	0.00322831
AT5G42740	0.251129	0.0497071	0.00324055
AT5G04840	-0.282667	0.0497035	0.00324155
AT1G54320	0.224163	0.0496929	0.00324455
AT1G51680	0.223661	0.049689	0.00324562
AT4G35785	-0.269555	0.0496564	0.00325484
AT4G29400	-0.223191	0.0496446	0.00325818
AT5G42980	-0.210924	0.0495767	0.00327748
AT4G39990	0.229372	0.0495751	0.00327792
AT1G66900	0.23262	0.049567	0.00328022
AT3G56950	0.263484	0.0495375	0.00328866
AT4G14120	-0.269178	0.0495117	0.00329604
AT2G36120	0.219655	0.0495043	0.00329817
AT2G19670	-0.195455	0.0494884	0.00330272
AT1G16560	0.255988	0.0494714	0.0033076
AT5G48480	-0.280849	0.0494652	0.00330938
AT2G35840	0.246159	0.04944	0.00331664
AT2G20210	-0.22847	0.0494356	0.00331792
AT4G28450	-0.226686	0.0494028	0.00332739
AT3G16180	0.258769	0.0493937	0.00333002
N_new_gene_42	-0.254441	0.0493612	0.00333944
AT4G29010	0.244867	0.0493557	0.00334103
N_new_gene_454	0.272499	0.0493098	0.0033544
AT3G53365	-0.275871	0.0492654	0.00336738
AT2G28056	-0.263301	0.0492555	0.00337027
AT2G37450	-0.217479	0.0492546	0.00337053
AT3G43670	0.259953	0.0492482	0.00337239
N_new_gene_35	0.20674	0.049199	0.00338685
AT1G50575	-0.200287	0.0491924	0.0033888
AT1G73180	0.24149	0.0491688	0.00339575
AT2G39330	0.316539	0.0491558	0.00339961
AT5G39500	0.238978	0.0491519	0.00340076
AT1G74090	0.277345	0.0491477	0.00340199
AT3G56120	-0.254807	0.0491347	0.00340585
AT3G20000	-0.230191	0.0491217	0.00340969
AT2G31730	-0.270108	0.0490476	0.00343173
AT3G09680	-0.210975	0.0490432	0.00343303
AT5G62530	0.240159	0.0490346	0.00343561
AT4G26800	-0.300943	0.0490189	0.0034403
AT4G33260	-0.25944	0.0489824	0.00345125
AT1G44180	0.235866	0.0489524	0.00346025
AT1G01370	-0.274508	0.048939	0.00346429
AT4G31100	0.222926	0.0489347	0.00346557
AT5G14050	-0.295329	0.0488553	0.00348957
AT1G26880	-0.253827	0.0488519	0.00349062
AT1G34065	-0.256623	0.0488474	0.00349199
AT2G30590	-0.229545	0.0488201	0.00350028
AT3G21670	0.217125	0.0488075	0.00350412
AT1G21230	0.268121	0.0487992	0.00350664
AT3G55280	-0.233747	0.0487929	0.00350856
AT2G24200	0.273206	0.0487901	0.00350942
AT1G19850	-0.212016	0.0487847	0.00351106
AT5G67150	0.260369	0.0487526	0.00352089
N_new_gene_469	-0.223158	0.0487332	0.00352682
AT3G13740	-0.262543	0.048723	0.00352995
AT2G18280	0.23096	0.0486818	0.00354261
AT4G00240	0.219158	0.0486779	0.00354383
AT5G38300	-0.244672	0.0486186	0.00356214
AT3G16470	0.28186	0.0485882	0.00357158
AT5G09920	-0.291288	0.0485786	0.00357456
AT4G24160	0.188707	0.0485681	0.00357782
AT4G25960	0.276735	0.0485207	0.00359258
AT3G04710	-0.238559	0.0485133	0.0035949
AT2G29340	0.252089	0.0485108	0.00359568
AT1G17290	0.236767	0.0485082	0.00359651
AT5G62300	-0.24566	0.0484841	0.00360405
AT5G13830	-0.266273	0.0484726	0.00360764
AT3G51670	-0.29026	0.0484697	0.00360857
AT2G27330	-0.21511	0.0484631	0.00361062
AT4G30190	0.2594	0.0484296	0.00362116
AT4G14342	-0.271863	0.0484121	0.00362668
AT5G28060	-0.280356	0.0483694	0.00364018
AT1G65310	0.224221	0.0483658	0.00364131
AT5G18440	-0.204535	0.0482629	0.00367405
AT2G34060	-0.248048	0.0482181	0.00368837
AT5G23535	-0.276685	0.0482076	0.00369175
AT5G56530	-0.231931	0.0481837	0.00369944
AT4G38360	0.219926	0.0481776	0.00370138
AT1G22770	0.27796	0.0481702	0.00370377
N_new_gene_427	-0.216141	0.0481538	0.00370905
AT1G12240	0.243092	0.0481452	0.00371183
AT1G48110	0.255895	0.0481143	0.00372181
AT3G05470	-0.257101	0.048094	0.00372839
AT3G50440	0.239821	0.0480824	0.00373216
AT3G16460	0.259252	0.0480755	0.00373441
AT4G29210	0.230856	0.0480718	0.00373562
AT3G44990	0.21089	0.0480648	0.00373788
AT5G04200	0.269835	0.0480607	0.00373923
N_new_gene_73	-0.237117	0.0480545	0.00374122
AT5G24240	0.233115	0.0479945	0.00376082
AT5G28640	-0.259022	0.0479824	0.00376475
AT2G45810	-0.249653	0.0479645	0.00377064
AT5G03870	-0.233328	0.0479573	0.003773
AT1G65220	-0.24453	0.0479557	0.00377353
AT5G07690	0.225014	0.0479369	0.00377968
AT5G14640	-0.262273	0.0479303	0.00378185
AT1G01390	-0.25028	0.0478702	0.00380167
AT1G68740	-0.256582	0.0478406	0.00381148
AT1G52240	-0.242837	0.0478357	0.00381309
AT5G03990	0.238263	0.0478069	0.00382268
AT3G56260	0.260009	0.047803	0.00382396
AT2G38730	-0.229732	0.0477947	0.00382672
AT1G10820	-0.245872	0.0477904	0.00382816
AT3G19150	-0.259673	0.0477821	0.00383093
AT5G18430	0.221128	0.0477817	0.00383106
AT3G16860	0.239868	0.0477685	0.00383544
AT3G03630	-0.235378	0.0477674	0.00383584
AT5G64570	0.253183	0.0477567	0.0038394
AT5G03415	-0.205289	0.0477557	0.00383974
AT1G76360	0.252265	0.0477529	0.00384068
AT5G42350	-0.255274	0.0477171	0.00385264
AT1G10090	0.250098	0.0477053	0.00385662
AT1G15820	0.243878	0.0476945	0.00386021
AT3G63180	0.24137	0.0476628	0.0038709
AT5G40650	0.199513	0.0476437	0.00387734
AT3G27380	0.183556	0.0476378	0.0038793
AT2G03500	-0.259721	0.0476239	0.00388401
AT2G07340	-0.265904	0.0476166	0.00388648
AT2G37310	-0.228279	0.0476022	0.00389136
AT2G29200	-0.214263	0.0475945	0.00389395
AT1G49200	-0.250267	0.047588	0.00389616
AT4G20270	-0.257839	0.0475792	0.00389912
AT4G37445	-0.29284	0.0475651	0.00390393
AT3G51830	0.262141	0.0475625	0.0039048
AT1G07720	0.257031	0.0475614	0.00390519
AT3G03305	0.216025	0.0475445	0.00391094
AT3G13350	-0.22598	0.0475214	0.00391879
AT3G63490	0.237946	0.0475168	0.00392037
AT3G08620	-0.234471	0.0475036	0.00392486
AT5G61240	0.244036	0.0474974	0.00392698
AT1G55080	-0.247795	0.0474938	0.0039282
AT2G20450	-0.27003	0.0474606	0.00393959
AT4G18830	-0.263652	0.0474537	0.00394195
AT2G33260	-0.244386	0.047424	0.00395214
AT2G38810	-0.265645	0.0473724	0.00396992
AT5G24780	0.325019	0.0473636	0.00397296
AT4G01925	0.184804	0.0473417	0.00398054
AT2G22660	0.252842	0.047251	0.00401206
AT5G05430	0.182899	0.0472493	0.00401266
AT1G20920	-0.243807	0.0472433	0.00401474
AT3G17360	-0.186643	0.0472268	0.00402053
AT1G09350	-0.183918	0.0471987	0.00403036
AT1G75166	-0.216737	0.0471976	0.00403074
AT2G03050	-0.217266	0.0471603	0.00404386
AT5G39320	0.25739	0.0471275	0.00405541
AT5G27390	-0.218617	0.047115	0.00405982
AT3G47640	-0.228318	0.0470908	0.00406836
AT1G54350	0.248111	0.0470358	0.00408788
AT5G35995	-0.236577	0.0470268	0.00409109
AT1G77420	0.216871	0.0469978	0.00410142
AT4G28220	0.222587	0.0469809	0.00410748
AT2G04840	-0.245466	0.0469773	0.00410876
AT1G48390	-0.24036	0.0469271	0.00412673
AT1G53850	-0.211091	0.0469262	0.00412706
AT1G13400	-0.173592	0.0469261	0.00412711
AT3G62790	-0.233391	0.0469038	0.00413511
AT4G27720	0.238111	0.0468672	0.0041483
AT5G56580	-0.226989	0.0468667	0.00414848
AT3G03780	0.253748	0.0468474	0.00415547
AT2G44510	-0.23916	0.0468379	0.00415889
AT1G54380	-0.209449	0.0468222	0.00416458
AT1G70980	0.26795	0.0468139	0.00416761
AT1G21380	0.224438	0.0468006	0.00417243
AT3G45930	-0.284857	0.0467995	0.00417281
AT1G68060	-0.226586	0.0467718	0.0041829
AT2G38420	-0.256697	0.0467708	0.00418324
N_new_gene_483	-0.219876	0.0466765	0.00421773
AT4G08160	0.22032	0.0466728	0.00421908
AT1G07960	-0.234751	0.0466726	0.00421917
AT2G35605	-0.241372	0.046663	0.00422268
AT1G51390	0.204198	0.0466507	0.00422721
AT4G36760	0.22594	0.0466101	0.00424216
AT2G05765	-0.210598	0.0466076	0.00424311
AT3G18440	0.232659	0.0465952	0.00424767
AT4G03570	0.239754	0.046583	0.0042522
AT3G26815	-0.239952	0.0465543	0.00426281
AT5G23670	0.23734	0.0464965	0.00428432
AT3G01570	-0.285874	0.0464943	0.00428512
AT4G29220	0.238822	0.0464898	0.00428681
AT5G05240	-0.231789	0.0464856	0.00428837
AT5G47750	0.264356	0.0464709	0.00429388
AT1G53580	0.206426	0.0464611	0.00429753
AT1G51540	0.261056	0.0464454	0.0043034
AT3G14350	0.271612	0.0463992	0.00432074
AT5G22810	-0.258406	0.0463977	0.00432131
AT1G23360	-0.238986	0.0463928	0.00432316
AT1G78570	0.229662	0.0463848	0.00432617
AT5G47610	-0.248837	0.0463787	0.00432848
AT1G23410	-0.248015	0.0463784	0.00432856
AT2G38760	0.241539	0.0463591	0.00433585
AT3G55485	-0.215768	0.0463499	0.00433935
AT3G14270	0.271321	0.0463211	0.00435022
AT3G11490	-0.225007	0.0463146	0.00435268
AT5G49510	-0.259692	0.0462922	0.00436119
AT5G06710	-0.228789	0.0462803	0.00436571
AT3G15190	0.233152	0.0462492	0.00437754
AT5G64990	-0.220652	0.0461855	0.00440189
AT5G01410	0.232306	0.0461725	0.00440687
AT2G41120	0.227635	0.0461692	0.00440812
AT2G40475	0.211177	0.0461633	0.00441038
AT2G45780	-0.226129	0.046146	0.00441703
AT5G39610	-0.247368	0.0461411	0.00441893
AT1G48170	-0.242256	0.0461282	0.00442389
AT2G36870	0.243508	0.0461278	0.00442403
AT2G04845	-0.281861	0.0461262	0.00442465
AT3G10300	0.24666	0.0461133	0.00442963
AT2G35140	-0.219663	0.0461092	0.00443119
AT1G10360	0.231201	0.046084	0.00444095
AT2G39880	-0.235194	0.0460081	0.00447038
AT3G54990	0.231051	0.0459788	0.0044818
AT4G36680	-0.213787	0.0459748	0.00448335
AT4G37120	-0.227925	0.0459744	0.0044835
AT1G67210	-0.245858	0.0459355	0.00449873
AT1G79430	-0.259203	0.0459212	0.00450434
AT3G53940	-0.20079	0.0459103	0.00450859
AT3G18910	-0.271729	0.0458628	0.00452729
AT5G54080	0.223068	0.0458399	0.00453632
AT2G02800	0.250158	0.045784	0.00455847
AT5G58330	0.24531	0.0457826	0.00455902
AT5G02610	-0.246627	0.0457645	0.00456619
AT1G02335	0.219437	0.0457536	0.00457053
AT1G07880	-0.215278	0.0457284	0.00458056
AT3G14230	-0.21957	0.0457055	0.00458971
AT2G14880	-0.218229	0.0456731	0.00460269
AT4G19650	-0.226497	0.0456609	0.00460758
AT3G03460	-0.246623	0.0456474	0.00461301
AT4G36250	0.221115	0.0456336	0.00461855
AT2G42230	0.230187	0.0456079	0.00462888
AT3G62630	0.256246	0.0455752	0.00464209
AT4G38330	-0.220527	0.0455449	0.00465433
AT5G49900	0.240736	0.0455403	0.00465623
AT3G55370	-0.222362	0.0454838	0.00467918
N_new_gene_508	-0.223199	0.0454722	0.00468391
AT3G55660	-0.255787	0.04547	0.00468479
AT1G02830	0.237228	0.0454156	0.00470705
AT3G05420	0.247024	0.0453539	0.0047324
AT2G03890	-0.209378	0.0453534	0.0047326
AT3G05590	-0.270218	0.0453336	0.00474078
AT5G50160	0.235518	0.0453269	0.00474356
AT1G23090	0.244414	0.0453245	0.00474453
AT2G47940	0.24726	0.0453126	0.00474948
AT3G60340	0.235882	0.0453002	0.00475459
AT2G28060	-0.267215	0.0452838	0.0047614
AT4G01390	0.243051	0.04528	0.00476298
AT5G08160	0.211269	0.0452073	0.00479322
AT5G52820	-0.201185	0.0452029	0.00479507
AT1G57610	-0.185695	0.0452005	0.00479607
AT3G09740	0.225908	0.0451959	0.00479799
N_new_gene_191	-0.226421	0.045193	0.00479919
AT1TE82695	-0.260801	0.0451751	0.00480668
AT2G41140	-0.217571	0.045148	0.00481803
AT1G23970	0.234835	0.0451478	0.00481811
AT5G49360	-0.287569	0.0451178	0.00483072
AT3G25770	0.238748	0.0451052	0.00483603
AT5G67220	0.230966	0.0450751	0.00484873
AT4G01270	-0.246277	0.0450549	0.00485728
AT4G14720	-0.26192	0.0450435	0.00486208
AT1G01720	0.207647	0.0450291	0.00486818
AT4G33670	0.249579	0.0450224	0.00487105
AT1G70700	0.264011	0.0450032	0.0048792
AT4G24110	0.217825	0.0449752	0.00489112
AT3G49010	-0.23071	0.0449479	0.00490278
AT4G16008	-0.224773	0.0449216	0.00491401
AT2G42130	0.223836	0.0448943	0.00492572
AT5G58340	0.247577	0.0448877	0.00492853
AT2G40390	-0.224453	0.0448767	0.00493326
AT1G12110	0.239488	0.0448624	0.0049394
AT4G30210	0.262148	0.0448427	0.00494787
AT5G02150	0.247338	0.0448284	0.00495406
AT5G44390	0.223645	0.0448207	0.00495738
AT3G22820	0.235906	0.0448177	0.00495868
AT2G38170	0.228479	0.0448169	0.00495902
AT5G38150	-0.240962	0.0447928	0.00496943
AT5G39410	0.245305	0.0447906	0.00497038
AT1G02330	-0.22043	0.0447615	0.004983
AT3G23340	0.213744	0.0447315	0.00499608
AT5G58700	-0.224206	0.0447306	0.00499644
AT5G57170	-0.19406	0.0446975	0.00501089
AT5G11750	-0.233686	0.0446679	0.0050238
AT2G22900	0.314624	0.0446532	0.00503024
AT2G42190	-0.250077	0.0446359	0.00503784
AT5G24690	0.21654	0.0445692	0.0050672
AT5G08280	0.230642	0.0445616	0.00507054
AT5G14920	0.240886	0.0445564	0.00507287
AT3G27960	-0.241386	0.0445132	0.005092
AT4G19490	0.238201	0.0444955	0.00509983
AT1G78930	-0.276513	0.0444866	0.0051038
AT2G19450	0.240345	0.0444667	0.00511265
AT5G59540	0.250272	0.044464	0.00511385
AT2G04795	-0.251415	0.0444379	0.00512552
AT4G14490	-0.240041	0.0444123	0.00513694
AT3G10260	0.264175	0.0444105	0.00513777
AT1G01120	0.236386	0.0443921	0.00514598
AT3G22436	-0.191279	0.0443892	0.00514728
AT4G30650	-0.204513	0.0443767	0.00515293
AT3G50120	0.244382	0.0443481	0.00516577
AT1G35580	0.246652	0.0443253	0.00517603
AT4G01880	-0.263113	0.0442668	0.00520248
AT5G48910	-0.240701	0.0442568	0.00520701
AT1G50690	0.198623	0.0442523	0.00520906
AT5G10310	-0.237255	0.0442519	0.00520927
AT3G58650	-0.206982	0.0442436	0.00521302
AT1G61970	-0.210274	0.0442384	0.00521541
AT2G19750	-0.219094	0.0442309	0.00521878
AT4G24520	0.259878	0.0442295	0.00521945
AT5G39830	0.242201	0.0442109	0.00522792
N_new_gene_85	-0.150423	0.0441875	0.00523858
AT2G45510	0.238725	0.0441552	0.00525335
N_new_gene_532	-0.209279	0.044142	0.00525938
AT5G61330	-0.209064	0.0441356	0.00526232
AT2G33590	0.235087	0.0441182	0.00527032
AT1G73740	0.225563	0.044105	0.00527637
N_new_gene_224	-0.219882	0.0441038	0.00527691
AT1G11870	0.241848	0.0440716	0.00529174
AT1G04820	-0.276985	0.0440509	0.00530132
AT1G19190	0.200708	0.0440446	0.00530422
N_new_gene_453	-0.248489	0.0440292	0.00531136
AT5G44720	0.255037	0.0440028	0.00532359
AT3G60770	-0.233477	0.0439817	0.00533337
AT1G13080	0.216786	0.0439708	0.00533844
AT4G39630	-0.257261	0.0439654	0.00534095
AT3G22900	-0.250024	0.0439587	0.00534407
AT1G53390	0.23418	0.0439518	0.0053473
AT1G77520	0.223124	0.0439182	0.00536299
AT5G11160	-0.280085	0.0439171	0.0053635
AT1G74960	0.25769	0.0438845	0.00537877
AT4G03150	0.190093	0.0438799	0.0053809
AT5G43010	0.225738	0.0438604	0.00539009
AT2G27600	0.21694	0.0437903	0.00542312
AT2G41770	0.244474	0.0437536	0.00544048
AT3G14370	-0.246757	0.0437164	0.00545817
AT2G37890	-0.261161	0.0436856	0.00547282
AT1G72720	-0.199339	0.0436623	0.00548398
AT5G48810	0.260697	0.0436556	0.00548715
AT1G28380	0.23959	0.0436542	0.00548783
AT3G18610	0.23276	0.0436516	0.00548906
AT5G06850	-0.20012	0.0436498	0.00548994
AT5G26790	-0.221983	0.0436455	0.00549199
AT5G15960	-0.141424	0.0436379	0.00549563
AT1G74240	-0.267228	0.0436356	0.00549676
AT1G69450	0.253077	0.0436287	0.00550004
AT2G04350	0.221962	0.0436279	0.00550044
AT1G06370	-0.222474	0.0436244	0.0055021
AT5G41120	0.231433	0.0435986	0.0055145
AT5G25160	-0.208586	0.0435957	0.00551588
AT3G15070	0.228811	0.0435664	0.00553002
AT4G34710	0.210959	0.0435501	0.00553785
AT5G41170	-0.26355	0.0435315	0.00554687
AT2G36620	-0.183294	0.0435287	0.00554822
AT1G74410	0.198909	0.0435279	0.00554859
AT5G43330	0.267394	0.0435205	0.00555219
AT2G31040	0.236367	0.0435051	0.00555964
AT1TE53610	-0.266531	0.0435011	0.00556156
AT3G16410	0.235107	0.0434743	0.0055746
AT3G61220	0.218497	0.0434658	0.00557871
AT2G30000	-0.274847	0.0434479	0.00558742
AT4G30810	0.255161	0.0434367	0.0055929
AT3G19520	-0.298648	0.0434359	0.00559326
AT3G44720	0.224023	0.0434349	0.00559377
AT2G03710	-0.204065	0.0434256	0.00559829
AT3G07860	-0.21398	0.0433962	0.00561269
AT1G21690	-0.208358	0.0433875	0.00561694
AT1G07010	0.221977	0.0433519	0.00563441
AT5G49152	-0.215756	0.0433427	0.00563891
AT1G53380	-0.207164	0.043341	0.00563976
AT5G65960	0.224362	0.0433393	0.00564059
AT2G39050	0.223976	0.0433375	0.00564149
AT2G04235	-0.198561	0.0433158	0.00565216
AT5G24760	-0.25025	0.0432932	0.00566331
AT4G33000	-0.211266	0.0432667	0.0056764
AT1G15280	-0.212001	0.043261	0.00567924
AT1G42540	0.25596	0.0432591	0.00568017
AT4G00400	0.258105	0.0432534	0.00568301
AT4G15560	0.252187	0.0432475	0.0056859
AT3G49720	0.231207	0.0432343	0.00569246
AT5G50410	-0.269404	0.0432303	0.00569447
AT4G32285	0.22699	0.0432247	0.00569726
AT2G01730	-0.254871	0.0432222	0.0056985
AT1G70350	-0.229781	0.0431846	0.00571718
AT5G05550	-0.236359	0.0431772	0.00572087
N_new_gene_151	-0.232908	0.0431622	0.00572839
AT5G42060	-0.234053	0.0431545	0.00573221
AT4G22710	0.222719	0.0431446	0.00573716
AT2G26590	-0.232258	0.0431428	0.00573809
AT1G48580	-0.215921	0.0431324	0.00574329
AT2G47470	0.212407	0.0431233	0.00574783
N_new_gene_270	0.228095	0.0431217	0.00574862
AT4G31490	-0.211724	0.0430715	0.00577386
AT5G63200	0.229232	0.043071	0.0057741
AT2G21045	-0.197541	0.0430442	0.00578763
AT5G06360	-0.196017	0.0430397	0.0057899
AT1G03040	-0.228909	0.0429762	0.00582208
AT4G32790	-0.230269	0.0429676	0.00582642
AT1G09750	0.294052	0.0429372	0.00584189
AT3G11270	-0.246968	0.0429173	0.00585205
AT1G62990	0.243931	0.0429159	0.00585277
AT1G16400	0.225813	0.0429066	0.0058575
AT2G42570	-0.265624	0.0428985	0.00586167
AT4G20280	-0.273033	0.0428794	0.00587145
AT4G34060	-0.190367	0.0428776	0.00587235
AT5G58005	-0.284287	0.0428706	0.00587595
AT1G51510	-0.205879	0.0428704	0.00587605
AT1G04580	0.168906	0.0428555	0.0058837
AT1G74910	0.23952	0.0428445	0.00588934
AT3G51930	-0.281051	0.0428336	0.00589492
AT3G19620	0.211271	0.0427659	0.00592985
AT5G09300	-0.287133	0.0427554	0.00593529
AT3G44940	-0.249636	0.0427386	0.00594399
AT1G79570	0.241884	0.0427302	0.00594832
AT1G52000	0.233078	0.0427159	0.00595576
AT3G53220	-0.221945	0.0427054	0.00596123
AT4G39870	-0.252537	0.0426859	0.00597137
AT5G03260	0.230873	0.0426609	0.00598441
AT1G12550	0.242325	0.0426508	0.00598968
AT1G55090	0.232326	0.04264	0.00599533
AT3G06320	-0.223754	0.0426355	0.00599771
AT3G04260	-0.204799	0.042624	0.00600369
AT5G51670	-0.246842	0.0425764	0.00602868
AT2G32150	0.175983	0.0425749	0.00602949
AT5G58200	-0.261098	0.0425593	0.00603772
AT3G21620	0.189642	0.0425587	0.00603803
AT2G30424	0.229902	0.0425001	0.00606896
AT1G23770	0.190721	0.0424827	0.00607819
AT3G45710	0.226639	0.0424794	0.0060799
AT1G17840	0.236458	0.0424749	0.00608231
N_new_gene_312	-0.231325	0.0424735	0.00608306
AT3G22740	0.190183	0.042457	0.0060918
AT1G63470	-0.245446	0.0424236	0.00610961
AT1G53310	0.230204	0.0424218	0.00611058
AT2G33290	-0.20813	0.0424186	0.00611227
AT5G66420	0.259081	0.0424037	0.00612022
AT2G34490	0.251918	0.0423536	0.00614703
AT5G64780	0.207262	0.0423486	0.00614973
AT5G20720	0.202143	0.0423311	0.00615914
AT1G66860	0.200753	0.0423305	0.00615942
AT1G66260	-0.247581	0.0423244	0.00616272
AT4G03295	-0.200993	0.0423157	0.00616742
AT4G15900	-0.224466	0.0423097	0.00617062
AT3G25140	0.237301	0.042284	0.00618445
AT3G55490	-0.23854	0.0422831	0.00618495
AT5G40020	0.224671	0.0422788	0.00618731
AT2G38260	-0.218124	0.0422393	0.00620868
N_new_gene_383	-0.259957	0.0422392	0.00620869
AT1G06100	-0.209458	0.0422092	0.00622496
AT4G37270	0.198695	0.0421969	0.00623165
N_new_gene_502	-0.175947	0.0421754	0.00624338
AT4G26910	0.208912	0.042158	0.00625287
AT3G06480	0.233149	0.0421509	0.00625671
AT1G06800	0.237028	0.0421448	0.00626008
AT4G31810	-0.215041	0.042142	0.00626157
AT2G20724	-0.245929	0.042128	0.00626923
AT2G32940	-0.227891	0.0420997	0.00628474
AT2G22460	-0.213087	0.042091	0.00628951
AT3G44860	0.263134	0.0420826	0.00629413
AT3G11250	-0.203501	0.0420823	0.00629432
AT2G33320	-0.267995	0.0420368	0.00631935
AT2G01275	0.219975	0.0420365	0.00631952
AT5G52390	0.262519	0.0420246	0.00632609
AT5G15930	-0.203769	0.0420107	0.00633375
AT1G33140	-0.206217	0.0419948	0.00634254
AT1G73720	-0.170854	0.0419826	0.0063493
AT2G42070	-0.254013	0.0419751	0.00635349
AT2G23620	0.172751	0.0419434	0.00637106
AT5G01790	0.242636	0.0419244	0.00638166
AT3G59970	0.224161	0.0419226	0.00638264
AT3G19220	-0.265429	0.0419061	0.00639186
AT4G08980	-0.276148	0.0419012	0.00639462
AT1G70100	-0.229499	0.0418516	0.00642232
AT3G15356	0.274084	0.0418351	0.00643161
AT3G63140	0.231907	0.0418208	0.00643965
AT3G14980	-0.216118	0.0418102	0.00644556
N_new_gene_150	-0.241846	0.0417963	0.00645342
AT3G02570	0.233304	0.0417868	0.00645879
AT4G17530	0.253385	0.0417822	0.00646136
AT1G62035	-0.207326	0.0417819	0.00646151
AT2G21070	0.204702	0.0417624	0.00647254
AT3G24490	-0.24043	0.0417613	0.00647314
AT2G17800	-0.243946	0.0417403	0.00648502
AT3G44600	-0.23452	0.0417377	0.00648653
AT1G03300	-0.216266	0.0417377	0.00648653
AT1G72645	-0.194743	0.0417264	0.00649294
AT3G02160	-0.231604	0.0417234	0.00649462
AT5G51910	-0.237233	0.0417143	0.00649975
AT2G05220	-0.258268	0.0417098	0.00650234
AT5G07830	0.20263	0.0416945	0.00651104
AT5G14430	0.212801	0.0416765	0.00652124
AT2G35040	0.219852	0.0416666	0.00652692
AT2G14750	0.237853	0.0416663	0.00652709
AT3G03773	-0.225713	0.0416492	0.00653683
AT4G20960	-0.233813	0.0416391	0.00654258
AT3G27500	0.169665	0.041633	0.0065461
AT3G49380	-0.194903	0.041611	0.00655866
AT5G26340	0.252566	0.0416023	0.00656367
AT3G53180	0.209092	0.0415935	0.0065687
AT2G27090	0.232783	0.0415803	0.00657627
AT2G36720	-0.245287	0.0415443	0.00659694
N_new_gene_497	-0.173564	0.0415324	0.0066038
AT2G36050	-0.205321	0.0414979	0.00662374
AT2G31840	-0.281864	0.0414905	0.00662803
AT2G17130	0.210609	0.0414674	0.00664144
AT1G23870	-0.240324	0.0414642	0.00664325
AT3G13677	-0.260279	0.0414507	0.0066511
AT1G05730	-0.216238	0.041449	0.00665212
AT2G44195	-0.237985	0.0414469	0.00665332
AT5G62440	-0.274267	0.041445	0.0066544
AT1G28610	0.249987	0.0414301	0.00666306
N_new_gene_252	0.225571	0.0414295	0.00666341
AT3G18110	-0.182585	0.0414151	0.00667183
AT3G56940	0.276315	0.0413957	0.00668313
AT4G00170	-0.270945	0.0413885	0.00668733
AT3G09520	0.261635	0.041364	0.00670165
AT1G33811	0.237611	0.0413614	0.00670317
AT1G08170	-0.197378	0.0413594	0.00670433
AT3G12870	-0.223245	0.041354	0.00670748
AT1G08280	-0.280668	0.0413466	0.00671185
AT5G17020	-0.225941	0.0413363	0.0067179
AT3G13180	-0.202503	0.0413305	0.00672131
AT3G17465	-0.259002	0.0413173	0.00672901
AT3G52370	0.236819	0.0413124	0.00673192
AT1G43130	0.188571	0.0412608	0.00676232
AT4G17830	0.196878	0.0412589	0.00676344
AT1G22360	0.231099	0.0412581	0.00676393
AT5G13520	0.211231	0.041256	0.00676513
AT3G21300	-0.198433	0.0412289	0.00678118
AT2G26840	-0.255439	0.0412265	0.0067826
AT1G63610	-0.21274	0.0412039	0.00679601
AT1G64900	0.266883	0.0411872	0.00680592
AT4G39330	0.239646	0.041179	0.00681083
AT4G22380	-0.196215	0.041178	0.00681138
AT2G26810	-0.222346	0.041173	0.00681435
AT2G33630	0.220075	0.0411488	0.00682878
AT5G27820	-0.275136	0.0411318	0.00683897
AT5G52230	-0.22105	0.041128	0.00684119
AT4G39120	-0.152238	0.0411279	0.00684124
AT1G25682	-0.213808	0.0411276	0.00684143
AT1G13920	-0.198918	0.041125	0.00684301
AT5G41900	0.231914	0.0411236	0.00684382
AT1G80340	-0.217876	0.0411191	0.00684656
AT1G31230	0.224634	0.041103	0.00685616
AT5G46790	-0.191449	0.0410831	0.00686807
AT4G14160	0.244443	0.0409957	0.00692074
AT3G62090	-0.222757	0.0409859	0.00692665
AT3G11930	-0.18909	0.0409814	0.00692935
AT4G05320	-0.205285	0.0409622	0.00694102
AT2G36320	0.273091	0.0409074	0.00697431
AT3G14590	-0.232495	0.040899	0.00697942
AT3G48800	-0.229064	0.0408771	0.00699283
AT3G21200	0.222859	0.0408704	0.00699687
AT4G25630	-0.230191	0.0408445	0.00701276
AT4G24960	-0.233026	0.0408186	0.00702861
AT1G01630	0.238047	0.0408134	0.0070318
AT1G57770	0.204232	0.0408072	0.00703561
AT4G36110	0.199575	0.0408047	0.0070372
AT3G52460	-0.215057	0.0407623	0.00706329
AT2G40240	-0.278323	0.0407451	0.00707392
AT1G07820	-0.248927	0.0407401	0.00707699
AT1G47580	-0.253616	0.0407389	0.00707772
AT3G62010	0.262241	0.0407334	0.00708114
AT4G31000	-0.20384	0.0407251	0.00708631
AT5G03090	0.114475	0.0407019	0.00710064
AT3G13030	-0.255421	0.0406834	0.00711217
AT3G57770	-0.248871	0.0406782	0.00711539
AT3G02950	-0.23503	0.0406629	0.00712488
AT4G31420	0.20645	0.040644	0.0071367
AT4G11600	0.251127	0.0406424	0.00713766
AT1G80620	-0.211668	0.040628	0.00714663
AT2G30320	-0.222687	0.0406194	0.00715202
AT2G13600	-0.222739	0.0406072	0.00715968
AT5G64770	0.190232	0.0406028	0.00716239
AT2G20700	0.192224	0.0405671	0.00718481
AT3G02360	0.210687	0.0405623	0.00718778
AT5G57120	-0.253844	0.0405553	0.00719217
AT3G18860	0.233589	0.0405523	0.00719409
AT1G06230	-0.202714	0.0405355	0.00720466
AT5G16010	0.228016	0.0404757	0.00724241
AT5G40740	-0.2002	0.0404492	0.00725918
AT1G56000	-0.210019	0.040427	0.00727331
AT5G57160	0.207923	0.040427	0.00727332
AT5G46460	-0.21647	0.0404213	0.0072769
AT3G46668	-0.22994	0.0403795	0.00730357
AT5G49170	-0.171983	0.0403708	0.0073091
AT1G75450	0.233	0.0403315	0.00733423
AT5G48000	0.218302	0.0403295	0.00733556
AT3G28500	-0.191874	0.0403271	0.00733707
AT5G01770	-0.229858	0.0403261	0.00733773
AT4G28320	0.213661	0.0403116	0.007347
AT4G31990	0.215215	0.0403018	0.0073533
AT5G65400	-0.250688	0.0403016	0.00735344
AT5G37560	0.17383	0.0402844	0.00736455
AT2G45560	0.255772	0.0402629	0.00737838
AT3G05165	0.220224	0.0402594	0.00738062
AT2TE75960	-0.189752	0.0402542	0.00738397
AT3G48050	-0.213921	0.0402507	0.00738625
AT5G41340	-0.217804	0.0402428	0.00739135
AT1G06430	0.211831	0.0402304	0.00739938
AT4G36780	-0.27336	0.0402294	0.0074
AT4G00200	-0.239583	0.0402249	0.00740293
AT5G08430	-0.210462	0.0402231	0.00740405
AT4G25515	-0.205882	0.0402231	0.00740411
AT1G41830	0.244979	0.0402228	0.00740427
AT3G08910	-0.256833	0.0401889	0.00742622
AT1G79310	0.179009	0.0401807	0.00743157
AT1G01470	-0.223793	0.0401691	0.00743908
AT1G13140	-0.241914	0.040157	0.007447
AT1G33520	-0.193928	0.0401487	0.00745237
AT5G37020	-0.180251	0.0401419	0.00745685
AT4G34250	0.267785	0.0401298	0.0074647
AT4G39540	-0.246219	0.0401168	0.00747321
AT5G25752	-0.213919	0.0401058	0.0074804
AT5G53130	0.226156	0.0400724	0.00750226
AT1G76150	0.244284	0.0400656	0.00750675
AT3G46820	-0.189532	0.040065	0.00750714
AT3G60180	0.228813	0.0400579	0.00751179
AT5G54160	0.193564	0.0400502	0.00751683
AT4G36580	-0.212621	0.0400239	0.00753415
AT5G06220	0.213803	0.0400119	0.00754207
AT3G24030	0.214442	0.039985	0.00755984
AT5G39340	-0.270637	0.0399573	0.00757812
AT5G20850	0.247557	0.0399384	0.0075907
AT4G15020	-0.223621	0.0399286	0.00759721
AT3G33002	-0.19051	0.0398962	0.00761871
AT4G17230	0.210457	0.0398953	0.0076193
AT5G38060	-0.21797	0.0398935	0.00762055
AT1G58290	0.216855	0.0398768	0.00763166
AT3G55646	-0.267203	0.0398745	0.00763322
AT2G21160	0.2229	0.0398621	0.00764148
AT2G33880	-0.244289	0.0398565	0.00764521
AT2G01250	-0.217565	0.0398424	0.00765463
AT4G33470	-0.203379	0.0397762	0.0076991
AT2G43180	0.227577	0.0397457	0.00771963
AT3G27110	0.218513	0.0397453	0.00771993
AT3G03250	0.227627	0.0397295	0.00773057
AT2G42005	-0.215594	0.0397152	0.00774029
AT3G07440	-0.204983	0.0397127	0.00774194
AT5G53300	0.216074	0.0397098	0.0077439
AT3G29320	0.239794	0.0396993	0.00775103
AT1G06475	-0.202039	0.0396876	0.00775895
AT5G26742	0.214529	0.0396754	0.00776723
AT3G12490	0.226734	0.0396724	0.00776932
AT1G03180	-0.218621	0.039668	0.00777227
AT4G14145	-0.257793	0.0396562	0.00778034
AT5G26710	0.227574	0.0396558	0.00778058
AT5G29000	0.203111	0.0396499	0.00778461
AT5G58640	0.233535	0.0395876	0.00782715
AT1G77280	0.213725	0.0395767	0.00783463
AT5G51174	-0.17218	0.0395759	0.00783514
AT1G12700	-0.259738	0.0395702	0.00783909
AT2G26760	-0.234085	0.0395641	0.00784322
AT2G39030	0.277058	0.0395538	0.00785029
AT3G59270	-0.247114	0.0395434	0.00785743
AT2G35680	0.197712	0.0395119	0.0078791
AT2G20780	0.214529	0.039511	0.00787977
AT5G49710	-0.237247	0.0394965	0.00788975
AT5G63140	-0.157318	0.0394938	0.00789159
AT2G20721	-0.183549	0.0394677	0.00790966
AT1G48040	-0.204363	0.039454	0.00791911
AT5G43100	0.211979	0.0394484	0.00792303
AT2G34860	-0.199988	0.0394346	0.00793255
AT1G15390	0.210095	0.0394326	0.00793399
AT3G62030	0.230734	0.0394057	0.00795264
AT3G25900	-0.241294	0.0394053	0.00795297
AT2G22640	-0.18949	0.0393466	0.00799385
AT5G35590	-0.218962	0.0393263	0.00800808
AT5G42660	-0.211157	0.0393172	0.00801449
AT3G04610	0.239818	0.0393115	0.00801847
AT4G30220	-0.258134	0.0392883	0.00803474
AT1G14620	-0.231722	0.0392705	0.00804725
AT1G02090	-0.236918	0.0392631	0.00805252
AT4G18440	0.250275	0.0392556	0.00805775
AT1G01110	-0.247449	0.039254	0.00805891
AT3G04340	-0.21774	0.0392429	0.00806676
AT2G45860	-0.219706	0.03924	0.0080688
AT5G40530	-0.239163	0.0392295	0.0080762
AT5G62690	-0.188322	0.0392083	0.00809116
AT1G24625	0.224508	0.0391975	0.00809882
AT3G05320	-0.193724	0.0391858	0.00810712
AT5G24165	-0.212616	0.0391845	0.00810809
AT2G20562	-0.221079	0.0391727	0.00811641
AT3G18030	-0.218874	0.0391655	0.00812153
AT1G21910	-0.144095	0.0391619	0.00812413
AT4G33870	0.1951	0.0391462	0.0081353
AT2TE56340	-0.165737	0.0390991	0.00816886
AT3G24810	-0.273247	0.0390838	0.00817985
AT4G04840	0.215646	0.0390755	0.00818575
AT2G39270	0.185432	0.0390601	0.00819677
AT3G18524	-0.213301	0.0390511	0.00820328
AT5G64670	-0.235203	0.0390145	0.00822959
AT2G40300	0.221134	0.0390044	0.00823688
AT5G48800	0.201113	0.0389933	0.00824484
AT4G05060	0.191262	0.0389887	0.00824817
AT3G55610	0.23082	0.0389835	0.00825191
AT1G33270	0.236228	0.0389778	0.00825605
AT2G01913	-0.264261	0.0389758	0.00825751
AT1G14980	-0.260155	0.0389573	0.00827088
AT1G80245	-0.243635	0.0389495	0.00827653
AT1G67810	0.244338	0.0389438	0.00828067
AT4G28860	0.199354	0.0389323	0.00828899
AT1G05420	-0.162035	0.0389013	0.00831152
AT3G48860	0.218463	0.038896	0.00831538
AT4G35020	-0.289428	0.0388909	0.00831909
AT2G01740	-0.188431	0.0388727	0.0083323
AT4G14240	0.214021	0.0388718	0.008333
AT1G29800	0.209796	0.0388526	0.00834699
AT3G13120	-0.17124	0.0388183	0.00837208
AT3G26410	-0.19722	0.038815	0.0083745
AT2G43190	-0.182027	0.0388081	0.00837959
AT1G30880	-0.227389	0.0387998	0.0083857
AT4G02720	-0.196191	0.0387942	0.00838976
AT3G13525	-0.183514	0.0387841	0.00839722
AT1G49960	0.196178	0.0387834	0.0083977
N_new_gene_412	-0.204389	0.0387807	0.00839971
AT3G52520	0.206142	0.0387638	0.00841211
AT3G04950	-0.226778	0.0387467	0.0084247
AT4G33490	0.246855	0.0387436	0.00842698
AT1G12770	-0.208164	0.0387014	0.00845819
AT5G46750	0.20931	0.0386735	0.00847886
AT3G08940	0.264879	0.0386574	0.00849084
AT3G05660	-0.240825	0.0386205	0.00851831
AT4G24670	-0.195525	0.0385978	0.00853522
AT4G25230	0.224612	0.0385928	0.00853902
AT5G02940	0.229681	0.0385536	0.00856836
AT4G03240	-0.251243	0.0385536	0.00856839
AT2G16930	-0.24807	0.0385516	0.00856983
AT1G52150	-0.233724	0.0385219	0.00859219
AT3G49470	-0.264191	0.0385174	0.00859555
AT5G67260	-0.236045	0.0385138	0.00859828
AT5G27850	-0.236949	0.0385046	0.00860515
AT4G38500	0.236174	0.0384847	0.00862017
AT5G20350	0.246924	0.0384839	0.00862077
AT5G16070	0.20212	0.0384774	0.00862568
AT4G30840	-0.215661	0.0384724	0.00862951
AT5G03520	-0.218762	0.0384693	0.00863185
AT2G36170	-0.225952	0.0384663	0.00863408
AT5G56290	0.229644	0.0384546	0.00864297
AT1G02305	0.235309	0.0384365	0.00865662
AT4G33625	-0.223223	0.0384253	0.00866518
AT5G14650	-0.203507	0.0384177	0.00867093
AT2G40960	-0.220735	0.0384095	0.00867711
AT5G19940	0.248584	0.0383856	0.00869532
AT5G05420	0.142138	0.0383744	0.00870382
AT3G26920	-0.180701	0.0383699	0.00870724
AT4G35470	-0.208127	0.038333	0.00873547
AT5G23860	0.239477	0.0383025	0.00875886
AT5G65970	0.241655	0.0382959	0.0087639
AT3G48660	-0.194293	0.0382945	0.00876493
AT1G14000	0.216178	0.0382779	0.0087777
AT1G04530	-0.226105	0.0382749	0.00878003
AT1G73030	0.227214	0.0382745	0.00878033
AT4G34120	0.191674	0.0382727	0.00878169
AT1G06890	0.196458	0.0382499	0.00879929
AT2G25710	-0.171001	0.038238	0.00880842
AT1G01770	0.229882	0.0381976	0.00883964
AT1G54385	-0.234191	0.0381886	0.00884666
AT3G57550	-0.273418	0.0381758	0.00885652
AT1G69390	-0.225831	0.0381747	0.00885743
AT3G63090	-0.213924	0.0381627	0.00886676
AT5G06130	0.210033	0.0381506	0.00887614
AT1G04425	-0.21834	0.0381452	0.00888033
AT3G13480	-0.279821	0.0381446	0.00888081
AT1G04250	0.219407	0.0381399	0.00888447
AT3G14452	-0.196076	0.0381248	0.00889619
AT1G23080	0.213167	0.0381171	0.00890221
AT5G23570	0.234358	0.0381057	0.0089111
AT3G47730	0.213763	0.0381043	0.00891217
AT5G17500	-0.224628	0.0380979	0.00891721
AT3G59330	-0.194356	0.0380963	0.00891843
AT3G46060	0.198447	0.0380719	0.00893754
AT1G78660	0.19534	0.0380684	0.00894022
AT3G47550	0.23145	0.038063	0.00894451
AT5G13030	0.200903	0.038061	0.00894609
AT2G40890	0.22238	0.0380562	0.00894979
AT2G27840	-0.207725	0.0380559	0.00895005
AT1G61860	-0.183768	0.0380453	0.00895839
AT3G21460	-0.263349	0.038044	0.00895939
AT5G58500	0.212591	0.0380386	0.00896365
AT1G22970	-0.242241	0.0380349	0.00896655
AT3G25100	-0.238328	0.0380312	0.00896947
AT2G01910	-0.240256	0.0380205	0.00897786
AT3G15740	-0.213716	0.0380186	0.00897937
AT2G38080	0.236588	0.0380043	0.00899058
AT1G56700	-0.201718	0.0379886	0.009003
AT3G46870	-0.247713	0.0379441	0.00903814
AT5G51720	0.186808	0.0379412	0.00904045
AT1G76590	0.218084	0.0379387	0.00904238
AT3G01800	-0.232276	0.0379127	0.009063
AT1G66330	-0.236442	0.0379104	0.00906489
AT3G52170	-0.198153	0.0379044	0.0090696
AT3G28740	0.144653	0.037903	0.0090707
AT4G38400	-0.208995	0.0379015	0.00907194
AT1G52990	0.176382	0.0378874	0.00908312
AT1G20910	-0.197293	0.0378576	0.00910687
AT3G44160	-0.212166	0.037851	0.00911218
AT1G49510	-0.216997	0.0378399	0.00912102
AT5G20910	0.194617	0.0378367	0.0091236
AT5G12320	-0.256109	0.0378237	0.00913397
AT1G50420	-0.244765	0.0378201	0.00913689
N_new_gene_513	-0.195613	0.037816	0.00914015
AT1G59900	0.217868	0.037816	0.00914016
AT3G16950	-0.205854	0.037814	0.00914176
AT3G03850	0.213826	0.0378135	0.00914213
AT1G73880	-0.302196	0.0377988	0.00915392
AT3G01410	-0.214891	0.0377939	0.00915784
AT2G36410	-0.226777	0.0377899	0.0091611
AT2G43780	-0.20405	0.0377869	0.00916351
AT5G27730	-0.222504	0.0377857	0.00916445
AT3G29725	0.164894	0.0377827	0.00916682
AT5G05670	-0.248995	0.0377821	0.00916731
AT3G02660	-0.265387	0.0377726	0.00917498
AT5G24420	0.228894	0.0377238	0.00921428
AT3G62530	0.223845	0.0377118	0.00922399
N_new_gene_403	-0.228335	0.0377106	0.00922497
AT4G21590	-0.232289	0.0377105	0.00922502
AT3G56850	-0.225065	0.0377067	0.00922808
AT1G06290	0.217898	0.0376822	0.0092479
AT3G05640	0.222129	0.0376534	0.00927131
AT3G20790	0.240209	0.0376486	0.00927524
AT5G01960	0.216599	0.0376366	0.00928495
AT1G30440	-0.232451	0.0376247	0.00929463
AT1G03020	-0.236233	0.0376237	0.00929543
AT1G23290	-0.210695	0.0376234	0.00929572
AT1G06190	-0.301946	0.037608	0.00930828
AT5G57565	-0.233851	0.0376043	0.00931129
AT4G12020	0.221968	0.0375882	0.00932446
AT5G51830	0.209655	0.037588	0.00932458
AT5G18750	0.170739	0.037586	0.00932624
AT4G24150	-0.227069	0.0375849	0.00932708
AT5G19540	0.160787	0.0375757	0.00933465
AT1G47420	0.191739	0.0375746	0.00933555
AT5G03630	0.26722	0.0375654	0.00934308
AT3G23830	-0.2221	0.0375601	0.00934739
AT1G29990	-0.213014	0.0375301	0.00937203
AT5G01820	0.2365	0.0375227	0.00937811
AT5G09860	-0.247886	0.0375141	0.00938519
AT4G14360	0.234992	0.0375029	0.00939437
AT2G17120	0.219489	0.0374718	0.00942
AT3G18490	0.237413	0.0374668	0.00942417
AT5G35520	-0.206934	0.0374665	0.00942441
AT4G10570	-0.193375	0.0374496	0.00943835
AT4G32400	-0.195429	0.0374457	0.00944161
AT1G51100	-0.236242	0.0374397	0.0094466
AT3G59760	0.219282	0.0373905	0.00948737
AT2G15430	-0.217509	0.0373703	0.00950422
AT5G59170	0.174774	0.0373231	0.00954359
AT4G34950	0.212777	0.0372727	0.00958589
AT5G53400	-0.276372	0.037271	0.0095873
AT4G11211	-0.184375	0.0372337	0.00961869
AT3G16920	0.199702	0.0372274	0.009624
AT1G21210	0.24463	0.037222	0.00962862
AT1G60730	0.205381	0.0372171	0.00963275
AT1G71060	-0.21601	0.0372078	0.00964054
AT2G39725	-0.257084	0.0372057	0.00964236
AT5G11570	0.219285	0.0371892	0.00965629
AT1G27470	-0.228068	0.0371568	0.00968378
AT3G44590	-0.208946	0.0371348	0.00970243
AT4G17390	0.201737	0.0371243	0.00971141
AT2G03390	-0.220027	0.0371225	0.00971295
AT1G24090	-0.202533	0.0371176	0.0097171
AT5G03220	-0.218127	0.0371046	0.00972822
AT3G04870	0.205157	0.037091	0.00973981
AT1G77270	-0.165666	0.037073	0.00975523
AT1G48930	-0.223057	0.0370518	0.00977332
AT5G17840	-0.177336	0.0370435	0.00978044
AT2G46970	-0.238655	0.0370384	0.0097848
AT3G27070	0.194996	0.0370248	0.00979654
AT5G59180	-0.226588	0.0370145	0.00980541
AT3G62810	-0.215215	0.0370033	0.00981498
AT3G05600	-0.275297	0.0369946	0.00982253
AT4G31480	-0.16496	0.0369906	0.00982593
AT5G40340	-0.226578	0.036981	0.00983419
AT3G60670	-0.216323	0.0369682	0.00984529
AT2G44120	-0.210342	0.0369633	0.00984951
AT5G50335	-0.214212	0.0369623	0.00985037
AT4G26900	0.194994	0.0369557	0.00985604
AT4G26540	-0.23049	0.036955	0.00985669
AT4G33520	0.233407	0.0369522	0.00985908
AT5G62710	-0.228586	0.036939	0.00987049
AT5G28840	0.182381	0.0369365	0.00987263
AT3G49670	-0.243359	0.0368674	0.00993267
AT5G65390	-0.226873	0.0368658	0.00993411
AT3G58196	-0.167824	0.0368632	0.00993638
AT2G38000	0.197995	0.0368543	0.00994406
AT4G04402	0.195367	0.0368371	0.00995912
AT4G34960	-0.207653	0.0368369	0.00995926
AT1G05850	0.243744	0.0368078	0.00998476
AT5G13740	-0.193877	0.0368009	0.00999082
AT5G01370	-0.236058	0.0367905	0.00999989
AT5G03290	0.211104	0.0367884	0.0100018
AT4G21490	0.153845	0.0367874	0.0100026
AT3G26812	-0.256882	0.0367794	0.0100096
AT2G13690	-0.238392	0.0367679	0.0100198
AT2G23370	-0.228178	0.0367605	0.0100263
AT1G22150	-0.210946	0.03676	0.0100267
AT5G45770	-0.216051	0.0367585	0.010028
AT1G24040	0.199423	0.036753	0.0100328
AT5G16250	-0.22683	0.0367488	0.0100366
AT1G54110	-0.217481	0.036694	0.0100849
AT4G31290	-0.231047	0.0366808	0.0100966
AT3G13405	-0.231663	0.0366637	0.0101118
AT3G17670	0.186938	0.0366531	0.0101212
AT5G05340	0.262278	0.0366417	0.0101313
AT2G16250	0.226474	0.0366388	0.0101338
AT4G30580	-0.230263	0.0366375	0.010135
AT5G46090	-0.189774	0.036622	0.0101488
AT2G25280	0.202986	0.0366203	0.0101504
AT3G55440	0.212371	0.03661	0.0101595
AT5G57060	-0.244164	0.0365956	0.0101724
AT1G57590	-0.226536	0.0365395	0.0102226
AT1G18070	-0.190525	0.0365365	0.0102252
AT2G39670	0.204779	0.0365317	0.0102296
AT1G76580	-0.224766	0.0365232	0.0102372
AT4G17560	-0.187298	0.0365199	0.0102401
AT1G53633	-0.239231	0.0365147	0.0102448
AT3G03450	0.20174	0.0365138	0.0102456
AT1G26340	-0.18202	0.0365106	0.0102485
AT5G38640	0.220715	0.0365013	0.0102569
AT5G19850	0.183314	0.0364905	0.0102665
AT2G34410	0.217058	0.0364714	0.0102838
AT2G41100	-0.152001	0.0364501	0.0103031
AT1G01180	0.176153	0.0364366	0.0103152
AT3G13190	-0.185815	0.0364346	0.0103171
AT2G29540	-0.236206	0.0364132	0.0103364
AT5G64430	0.211967	0.0363796	0.010367
AT4G39960	0.219521	0.0363724	0.0103735
[truncated: 19,128 more rows]
